1 **Gene knock-ins in *Drosophila* using homology-independent insertion of universal**  
2 **donor plasmids**

3

4 Justin A. Bosch<sup>1</sup>, Ryan Colbeth<sup>1</sup>, Jonathan Zirin<sup>1</sup>, Norbert Perrimon<sup>1,2</sup>

5

6 <sup>1</sup> Department of Genetics, Harvard Medical School, Boston, MA, 02115, USA

7 <sup>2</sup> Howard Hughes Medical Institute, Boston, MA, 02115, USA

8

9

10

11

12

13

14

15

16

17

18

19

20

21

22

23

24

25

26 **Short Running Title:** Homology-independent knock-ins in flies

27

28 **Keywords:** CRISPR-Cas9, knock-in, homology-independent, gene function, CRISPaint

29

30 **100-word article summary:** We report a new homology-independent genomic knock-in  
31 method in *Drosophila* to insert large DNA elements into any target gene. Using  
32 CRISPR-Cas9 and non-homologous end joining (NHEJ), an entire donor plasmid is  
33 inserted into the genome without the need for homology arms. This approach eliminates  
34 the burden associated with designing and constructing traditional donor plasmids. We  
35 demonstrate its usefulness in cultured cells and in vivo to fluorescently tag endogenous  
36 proteins, generate reporters of gene expression, and disrupt gene function.

37

38 **Corresponding author:**

39 Norbert Perrimon

40 Harvard Medical School

41 77 Avenue Louis Pasteur

42 Dept. of Genetics, NRB 336

43 Boston, MA 02115

44 617-432-7672

45

46 Email: [perrimon@genetics.med.harvard.edu](mailto:perrimon@genetics.med.harvard.edu)

47

48

49

50

51 **Abstract**

52

53 Site-specific insertion of DNA into endogenous genes (knock-in) is a powerful method to  
54 study gene function. However, traditional methods for knock-in require laborious cloning  
55 of long homology arms for homology-directed repair. Here, we report a simplified  
56 method in *Drosophila melanogaster* to insert large DNA elements into any gene using  
57 homology-independent repair. This method, known as CRISPaint, employs CRISPR-  
58 Cas9 and non-homologous end joining (NHEJ) to linearize and insert donor plasmid  
59 DNA into a target genomic cut site. The inclusion of commonly used elements such as  
60 GFP on donor plasmids makes them universal, abolishing the need to create gene-  
61 specific homology arms and greatly reducing user workload. Using this method, we  
62 show robust gene-specific integration of donor plasmids in cultured cells and the fly  
63 germ line. Furthermore, we use this method to analyze gene function by fluorescently  
64 tagging endogenous proteins, disrupting gene function, and generating reporters of  
65 gene expression. Finally, we assemble a collection of donor plasmids for germ line  
66 knock-in that contain commonly used insert sequences. This method simplifies the  
67 generation of site-specific large DNA insertions in *Drosophila* cell lines and fly strains,  
68 and better enables researchers to dissect gene function in vivo.

69

70

71

72

73

74

75

## 76 Introduction

77

78 Insertion of DNA into the animal genome is a powerful method to study gene  
79 function. This approach is multipurpose, and can be used to visualize protein  
80 localization (CRIVAT AND TARASKA 2012; HASSE *et al.* 2016; KANCA *et al.* 2017), to disrupt  
81 gene function (HOUSDEN *et al.* 2017), to assay gene expression (BRAND AND PERRIMON  
82 1993; IVICS *et al.* 2009; BOUABE AND OKKENHAUG 2013), or to purify endogenous proteins  
83 (KIMPLE *et al.* 2013). Furthermore, the ability to insert large DNA elements such as  
84 promoters, protein coding sequences, or entire genes into the genome offers  
85 researchers endless options for genome modification. *Drosophila melanogaster* is an  
86 excellent animal model to analyze gene function because of its many genetic tools, fast  
87 generation time, and in vivo analysis (VENKEN *et al.* 2016; KORONA *et al.* 2017; BIER *et*  
88 *al.* 2018).

89 The two most commonly used methods in *Drosophila* to knock-in DNA into  
90 endogenous genes involve either transposable elements or homology directed-repair  
91 (HDR). Transposable DNA elements insert randomly in the genome by a Transposase  
92 enzyme (BELLEN *et al.* 2011), and cannot be used to target a user-specified gene. In  
93 contrast, HDR is used to insert DNA into a specific genomic location by cleavage at the  
94 genomic locus and precise homologous recombination of the DNA insert into the  
95 genome (BIER *et al.* 2018). Circular plasmids are commonly used as donor DNA for  
96 HDR because they can carry a large DNA insert ( $\leq 10$ kb) and homology arms  
97 corresponding to the target locus are added by traditional cloning techniques. While  
98 HDR is a useful method, the design and construction of unique plasmid donors for each  
99 gene is laborious. As a cloning-free alternative, synthesized single-stranded DNA  
100 (ssDNA) with short homology arms (~50-100 bp each) (BIER *et al.* 2018) or long

101 ssDNAs of  $\leq 2$ kb (QUADROS *et al.* 2017) can be used as donors. However, ssDNA donors  
102 are limited to relatively small insertions such as epitope tags, and, like HDR plasmid  
103 donors, must be designed and produced for each gene that is targeted. Therefore, there  
104 is a need for easier, faster, and cheaper alternatives to knock-in large DNA elements  
105 into the *Drosophila* genome.

106 It was recently shown that large DNA elements could be knocked into a specific  
107 target locus without homology arms, known as homology-independent insertion  
108 (CRISTEA *et al.* 2013; MARESCA *et al.* 2013; AUER *et al.* 2014; KATIC *et al.* 2015; LACKNER  
109 *et al.* 2015; SCHMID-BURGK *et al.* 2016; SUZUKI *et al.* 2016; KATOH *et al.* 2017). In this  
110 method, simultaneous cutting of a circular donor plasmid and a genomic target-site by a  
111 nuclease such as Cas9 results in integration of the linearized donor plasmid into the  
112 genomic cut site by non-homologous end joining (NHEJ). This removes the need to  
113 construct homology arms, and only requires cloning or synthesizing a gene-specific  
114 single guide RNA (sgRNA). Furthermore, this approach is modular, since donor  
115 plasmids containing common insert sequences (e.g. GFP) can be targeted to different  
116 genomic locations and are thus “universal”. Generating knock-ins by homology-  
117 independent insertion has been successfully applied in human cell lines (CRISTEA *et al.*  
118 2013; MARESCA *et al.* 2013; LACKNER *et al.* 2015; SCHMID-BURGK *et al.* 2016; KATOH *et*  
119 *al.* 2017), mouse somatic cells (SUZUKI *et al.* 2016), zebrafish (AUER *et al.* 2014), and *C.*  
120 *elegans* (KATIC *et al.* 2015). However, this approach has not yet been applied in  
121 *Drosophila*.

122 Here, we show that homology-independent insertion functions effectively in  
123 *Drosophila* by using the CRISPaint method. We first characterize this method in  
124 cultured S2R+ cells, showing that a universal mNeonGreen donor plasmid can be used  
125 to fluorescently tag endogenous proteins at their C-terminus. We then demonstrate that

126 this approach works *in vivo*, using a universal *T2A-Gal4* donor plasmid in the fly germ  
127 line to obtain fly lines with insertions in a number of characterized genes. We show that  
128 these insertions can be used as expression reporters for the target gene and to  
129 generate loss-of-function phenotypes. Finally, we present a collection of different  
130 universal donor plasmids for the purpose of enabling the *Drosophila* research  
131 community to employ this method for their specific uses.

132

## 133 **Materials and Methods**

134

### 135 **Plasmid cloning**

136

137 *pCFD3-frame\_selector\_(0, 1, or 2)* plasmids (Addgene #s 127553-127555) were  
138 cloned by ligating annealed oligos encoding sgRNAs that target the CRISPaint target  
139 site (SCHMID-BURGK *et al.* 2016) into *pCFD3* (PORT *et al.* 2014), which contains the  
140 *Drosophila U6:3* promoter.

141 Additional sgRNA-encoding plasmids were generated by the TRiP  
142 (<https://fgr.hms.harvard.edu/>) or obtained from Filip Port (PORT *et al.* 2015). sgRNA  
143 plasmids targeting CDS close to the stop codon were *GP07595 (Act5c)*, *GP07596*  
144 *(His2Av)*, *GP07609 (alphaTub84B)*, and *GP07612 (Lam)*. sgRNA plasmids targeting  
145 CDS close to the start codon were *GP06461 (wg)*, *GP02894 (FK506-bp2)*, *GP05054*  
146 *(alphaTub84B)*, *GP00225 (esg)*, *GP00364 (Myo1a)*, *GP00400 (btl)*, *GP00583 (Mhc)*,  
147 *GP01881 (hh)*, *GP03252 (Desat1)*, *GP05302 (ap)*, *pFP545 (ebony)*, and *pFP573*  
148 *(ebony)*. These sgRNAs were cloned into *pCFD3*, with the exception of those targeting  
149 *esg*, *Myo1a*, *btl*, and *Mhc*, which were cloned into *pI100* (KONDO AND UEDA 2013).

150 *pCRISPaint-T2A-Gal4-3xP3-RFP* (Addgene # 127556) was constructed using  
151 Gibson assembly (E2611, NEB) of three DNA fragments: 1) *Gal4-SV40-3xP3-RFP* was  
152 PCR amplified from *pHD-Gal4-DsRed* (Xu et al. 2019 submitted PNAS, (GRATZ *et al.*  
153 2014); 2) linear plasmid backbone generated by digesting *pWalium10-roe* (PERKINS *et*  
154 *al.* 2015) with *Ascl/Sacl*; and 3) a synthesized double-stranded DNA fragment (gBlock,  
155 IDT) encoding the CRISPaint target site, linker sequence, T2A, and ends that overlap  
156 the other two fragments.

157 *pCRISPaint-T2A-ORF-3xP3-RFP* donor plasmids (Addgene #s 127557-127565)  
158 were cloned by PCR amplifying the ORFs and Gibson cloning into *CRISPaint-T2A-*  
159 *Gal4-3xP3-RFP* cut with *NheI/KpnI*. ORF sequences were amplified from templates as  
160 follows: *sfGFP* [amplified from *pUAS-TransTimer* (He et al. 2019 submitted)], *LexGAD*  
161 [amplified from *pCoinFLP-LexGAD/Gal4* (BOSCH *et al.* 2015)], *QF2* amplified from  
162 Addgene #80274, *Cas9-T2A-GFP* (amplified from template kindly provided by Raghuvir  
163 Viswanatha), *FLPo* (amplified from Addgene #24357), *Gal80* (amplified from Addgene  
164 #17748), *Nluc* (amplified from Addgene #62057), *Gal4DBD*, (amplified from Addgene  
165 #26233), and *p65* (amplified from Addgene #26234).

166 *pCRISPaint-sfGFP-3xP3-RFP* (Addgene # 127566) was cloned by PCR  
167 amplifying *sfGFP* coding sequence and Gibson cloning into *CRISPaint-T2A-Gal4-3xP3-*  
168 *RFP* cut with *NotI/KpnI*.

169 *pCRISPaint-CRIMIC\_phase\_(0,1, or 2)* (Addgene #s 127567-127569) donor  
170 plasmids were cloned by ligating annealed oligos containing the CRISPaint target site  
171 into *CRIMIC [pM37, (LEE et al. 2018)]* (frames 0,1,2) cut with *NsiI*.

172 *pCRISPaint-TGEM\_phase\_(0,1,or 2)* (Addgene #s 127570-127572) donor  
173 plasmids were cloned by ligating annealed oligos containing the CRISPaint target site  
174 into *T-GEM (DIAO et al. 2015)* (frames 0,1,2) cut with *AgeI/NotI*.

175 See Supplemental Table 6 for oligo and dsDNA sequences and Addgene for  
176 plasmid sequences.

177

## 178 **Cell culture**

179

180 *Drosophila* S2R+ cells stably expressing Cas9 and a mCherry protein trap in *Clic*  
181 (known as PT5/Cas9) (VISWANATHA *et al.* 2018) were cultured at 25°C using Schneider's  
182 media (21720-024, ThermoFisher) with 10% FBS (A3912, Sigma) and 50 U/ml penicillin  
183 strep (15070-063, ThermoFisher). S2R+ cells were transfected using Effectene  
184 (301427, Qiagen) following the manufacturer's instructions. Plasmid mixes were  
185 composed of sgRNA-expressing plasmids (see above) and *pCRISPaint-mNeon-PuroR*  
186 (SCHMID-BURGK *et al.* 2016). Cells were transfected with plasmid mixes in 6-well dishes  
187 at  $1.8 \times 10^6$  cells/ml, split at a dilution of 1:6 after 3-4 days, and incubated with 2 µg/ml  
188 Puromycin (540411 Calbiochem). Every 3-5 days, the media was replaced with fresh  
189 Puromycin until the cultures became confluent (~12-16 days). For single-cell cloning  
190 experiments, cultures were split 1:3 two days before sorting. Cells were resuspended in  
191 fresh media, triturated to break up cell clumps, and pipetted into a cell straining FACS  
192 tube (352235 Corning). Single cells expressing mNeonGreen were sorted into single  
193 wells of a 96 well plate containing 50% conditioned media 50% fresh media using an  
194 Aria-594 instrument at the Harvard Medical School Division of Immunology's Flow  
195 Cytometry Facility. Once colonies were visible by eye (3-4 weeks), they were expanded  
196 and screened for mNeonGreen fluorescence.

197

## 198 **Fly genetics and embryo injections**

199



200 Flies were maintained on standard fly food at 25°C. Fly stocks were obtained  
201 from the Perrimon lab collection or Bloomington Stock center (indicated with BL#).  
202 Stocks used in this study are as follows: *yw* (Perrimon Lab), *yw/Y hs-hid* (BL8846), *yw*;  
203 *nos-Cas9attP40/CyO* (derived from BL78781), *yw*; *nos-Cas9attP2* (derived from  
204 BL78782), *yw*; *Sp hs-hid/CyO* (derived from BL7757), *yw*; *Dr hs-hid/TM3,Sb* (derived  
205 from BL7758), *UAS-2xGFP* (BL6874), *wg1-17/CyO* (BL2980), *wg1-8/CyO* (BL5351),  
206 *Df(2L)BSC291/CyO* (BL23676), *Mhc[k10423]/CyO* (BL10995), *Df(2L)H20/CyO*  
207 (BL3180), *Df(2L)ED8142/SM6a* (BL24135), *hh[AC]/TM3 Sb* (BL1749),  
208 *Df(3R)ED5296/TM3, Sb* (BL9338), *esgG66/CyO UAS-GFP* (BL67748),  
209 *Df(2R)Exel6069/CyO* (BL7551).

210 For embryo injections, each plasmid was column purified (Qiagen) twice, eluted  
211 in injection buffer (100 µM NaPO<sub>4</sub>, 5 mM KCl), and adjusted to 200ng/µl. Plasmids were  
212 mixed equally by volume, and mixes were injected into *Drosophila* embryos using  
213 standard procedures. For targeting genes on Chr. 2, plasmid mixes were injected into  
214 *yw*; *nos-Cas9attP2* embryos. For targeting genes on Chr. 3, plasmid mixes were  
215 injected into *yw*; *nos-Cas9attP40/CyO* embryos. Approximately 500 embryos were  
216 injected for each targeted gene.

217 Injected G0 flies were crossed with *yw*. We used *yw/Y hs-hid* to facilitate  
218 collecting large numbers of virgin flies by incubating larvae and pupae at 37°C for 1hr.  
219 G1 flies were screened for RFP expression in the adult eye on a Zeiss Stemi SVII  
220 fluorescence microscope. G1 RFP+ flies were crossed with the appropriate balancer  
221 stock (*yw*; *Sp hs-hid/CyO* or *yw*; *Dr hs-hid/TM3,Sb*). G2 RFP+ males that were *yellow-*  
222 (to remove the *nos-Cas9* transgene) and balancer+ were crossed to virgins of the  
223 appropriate balancer stock (*yw*; *Sp hs-hid/CyO* or *yw*; *Dr hs-hid/TM3,Sb*). G3 larvae

224 and pupae were heat shocked at 37°C for 1hr to eliminate the *hs-hid* chromosome,  
225 which generates a balanced stock (e.g. yw; [RFP+]/CyO).

226

## 227 **Imaging**

228

229 S2R+ cells expressing mNeonGreen were plated into wells of a glass-bottom 384  
230 well plate (6007558, PerkinElmer). For fixed cell images, cells were incubated with 4%  
231 paraformaldehyde for 30min, washed with PBS with .1% TritonX-100 (PBT) 3x 5min  
232 each, stained with 1:1000 DAPI (D1306, ThermoFisher) and 1:1000 phalloidin-TRITC  
233 (P1951, Sigma), and washed with PBS. Plates were imaged on an IN Cell Analyzer  
234 6000 (GE) using a 20x or 60x objective. Time-lapse videos of live mNeonGreen  
235 expressing single cell cloned lines were obtained by taking an image every minute using  
236 a 60x objective. Images were processed using Fiji software.

237 Wing imaginal discs from 3<sup>rd</sup> instar larvae were dissected in PBS, fixed in 4%  
238 paraformaldehyde, and permeabilized in PBT. For Wg staining, carcasses were blocked  
239 for 1hr in 5% normal goat serum (S-1000, Vector Labs) at room temp, and incubated  
240 with 1:50 mouse anti-wg (4D4, DSHB) primary antibody and 1:500 anti-mouse 488 (A-  
241 21202, Molecular Probes) secondary antibody. Primary and secondary antibody  
242 incubations were performed at 4°C overnight. All carcasses were stained with DAPI and  
243 phalloidin-TRITC, and mounted on glass slides with vectashield (H-1000, Vector  
244 Laboratories Inc.) under a coverslip. Images of mounted wing discs were acquired on a  
245 Zeiss 780 confocal microscope.

246 Larvae, pupae, and adult flies were imaged using a Zeiss Axio Zoom V16  
247 fluorescence microscope.

248

## 249 **Quantification of mNeonGreen expressing S2R+ cells**

250

251 For FACs-based cell counting, we collected cultures from each gene knock-in  
252 experiment before and after puromycin selection. Pre-selection cultures were obtained  
253 by collecting of 500ul of culture 3-4 days after transfection. Post-selection cultures were  
254 obtained after at least 2 weeks of puromycin incubation. Non-transfected cells were  
255 used as a negative control. 100,000 cells were counted for each sample and FlowJo  
256 software was used to analyze and graph the data. FSC-A vs GFP-A was plotted and we  
257 defined mNeonGreen+ cells by setting a signal intensity threshold where <0.02% of  
258 negative controls are counted due to autofluorescence.

259 For microscopy-based cell counting, the number of mNeonGreen cells was  
260 quantified by analyzing confocal images in Fiji using the manual Cell Counter Plugin  
261 (model). For transfected cells, 6 fields containing at least 200 cells were quantified (i.e.  
262 n=6). For puro-selected cells, 3 fields containing at least 200 cells were quantified (i.e.  
263 n=3).

264

## 265 **Western blotting**

266

267 Single cell-cloned cell lines were grown until confluent and 1ml of resuspended  
268 cells was centrifuged at 250g for 10min. The cell pellet was resuspended in 1ml ice cold  
269 PBS, re-centrifuged, and the pellet was lysed in 250ul 2x SDS-Sample buffer and boiled  
270 for 5min. 10ul was loaded on a 4-20% Mini-Protean TGX SDS-Page gel (4561096,  
271 BioRad), transferred to PVDF membrane (IPFL00010, Millipore), blocked in 5% non-fat  
272 dry milk, primary blotting using anti-mNeonGreen (1:1000, Chromtek 32F6) or hFAB™  
273 Rhodamine Anti-Actin (12004164 BioRad), and secondary blotting using 1:3000 anti-

274 mouse HRP (NXA931, Amersham), imaging using ECL (34580, ThermoFisher) on a  
275 ChemiDoc MP Imaging System (BioRad).

276

## 277 **PCR, sequencing, and sgRNA cutting assays**

278

279 S2R+ cell genomic DNA was isolated using QuickExtract (QE09050, Lucigen).  
280 Fly genomic DNA was isolated by grinding a single fly in 50µl squishing buffer (10 mM  
281 Tris-Cl pH 8.2, 1 mM EDTA, 25 mM NaCl) with 200µg/ml Proteinase K (3115879001,  
282 Roche), incubating at 37°C for 30 min, and 95°C for 2 minutes. PCR was performed  
283 using Taq polymerase (TAKR001C, ClonTech) when running DNA fragments on a gel,  
284 and Phusion polymerase (M-0530, NEB) was used when DNA fragments were  
285 sequenced. DNA fragments corresponding to *mNeonGreen* or *T2A-Gal4* insertion sites  
286 were amplified using primer pairs where one primer binds to genomic sequence and the  
287 other primer binds to the insert. For amplifying non-knock-in sites, we used primers that  
288 flank the sgRNA target site. Primer pairs used for gel analysis and/or Sanger  
289 sequencing were designed to produce DNA fragments <1kb. Primer pairs used for next-  
290 generation sequencing of the insertion site were designed to produce DNA fragments  
291 200-280bp. DNA fragments were run on a 1% agarose gel for imaging or purified on  
292 QIAquick columns (28115, Qiagen) for sequencing analysis. See Supplemental Table 6  
293 for oligo sequences.

294 Sanger sequencing was performed at the DF/HCC DNA Resource Core facility  
295 and chromatograms were analyzed using Lasergene 13 software. Next-generation  
296 sequencing was performed at the MGH CCIB DNA Core. Fastq files were analyzed  
297 using CRISPresso2 (CLEMENT *et al.* 2019) by entering the PCR fragment sequence into  
298 the exon specification window and setting the window size to 10 bases. Quantification of

299 insertion types (seamless, in-frame in/del, and frameshift in/del) was taken from the  
300 allele plot and frame shift analysis outputs of CRISPresso2. The small proportion of  
301 “unmodified” reads that were not called by frameshift analysis were not included in the  
302 quantification.

303 T7 endonuclease assays (M0302L, NEB) were performed following the  
304 manufacturer instructions.

305

### 306 **Data availability:**

307

308 Donor plasmids and frame selector sgRNA plasmids will be deposited at Addgene. Fly  
309 strains, S2R+ cell lines, and sequence data are available on request. Oligo and dsDNA  
310 sequences are listed in Supplemental Table 6.

311

### 312 **Results**

313

314 To test homology-independent knock-in in *Drosophila*, we implemented a  
315 strategy known as CRISPaint (SCHMID-BURGK *et al.* 2016). This system is used to insert  
316 a protein tag or reporter gene into the coding sequence of an endogenous gene.  
317 Although it was originally designed for mammalian cell culture, CRISPaint has several  
318 advantages for use in *Drosophila*. First, this system uses CRISPR-Cas9 to induce  
319 double-strand breaks (DSBs), which is known to function efficiently in *Drosophila*  
320 cultured cells (BOTTCHEER *et al.* 2014; VISWANATHA *et al.* 2018) and the germ line (KONDO  
321 AND UEDA 2013; REN *et al.* 2013; YU *et al.* 2013; BASSETT *et al.* 2014). Second, its use of  
322 a frame-selector gRNA target site makes insertion into the appropriate translation frame  
323 simple and modular (see below). Third, a collection of existing CRISPaint donor

324 plasmids (SCHMID-BURGK *et al.* 2016) containing common tags (e.g. GFP, RFP,  
325 Luciferase) are seemingly compatible for expression in *Drosophila*.

326 The CRISPaint system works by introducing three components into Cas9-  
327 expressing cells: 1) a single guide RNA (sgRNA) targeting a genomic locus; 2) a donor  
328 plasmid containing an insert sequence; and 3) a frame selector sgRNA targeting the  
329 donor plasmid (Figure 1A). This causes simultaneous cleavage of the genomic locus  
330 and donor plasmid, leading to the integration of linearized donor into the genomic cut  
331 site by non-homologous end joining (NHEJ). To ensure that the donor plasmid inserts  
332 in-frame with the endogenous gene, one of three frame selector sgRNAs are used.  
333 Importantly, these frame-selector sgRNAs do not target the *Drosophila* genome.

334

### 335 **Homology-independent insertion functions efficiently in *Drosophila* S2R+ cells to** 336 **produce endogenous protein tags**

337

338 To test if the CRISPaint method functions in *Drosophila*, we set out to replicate  
339 the findings of (SCHMID-BURGK *et al.* 2016) in cultured S2R+ cells by genetically tagging  
340 endogenous proteins at their C-terminus. To accomplish this, we generated plasmids  
341 expressing frame-selector sgRNAs (frame 0, 1, or 2) under the control of *Drosophila* U6  
342 sequences (PORT *et al.* 2015) (Figure 1A). In addition, we generated plasmids  
343 expressing sgRNAs that target the 3' coding sequence of endogenous *Drosophila*  
344 genes. We chose to target *Actin5c*, *His2Av*, *alphaTub84B*, and *Lamin* because these  
345 genes are expressed in S2R+ cells (HU *et al.* 2017) and encode proteins with known  
346 subcellular localization (actin filaments, chromatin, microtubules, nuclear envelope,  
347 respectively). For donor plasmid, we used *pCRISPaint-mNeonGreen-T2A-PuroR*  
348 (SCHMID-BURGK *et al.* 2016), which contains a frame-selector sgRNA target site

349 upstream of coding sequence for the fluorescent mNeonGreen protein and Puromycin  
350 resistance protein (PuroR) linked by a cleavable T2A peptide sequence. Importantly,  
351 only integration of the donor plasmid in-frame with the target gene coding sequence will  
352 result in translation of mNeonGreen-T2A-PuroR (Figure 1A).

353 We transfected Cas9-expressing S2R<sup>+</sup> cells (VISWANATHA *et al.* 2018) with a mix  
354 of three plasmids: *pCRISPaint-mNeonGreen-T2A-PuroR* donor, target-gene sgRNA,  
355 and the appropriate frame-selector sgRNA (Figure 1A, Supplemental Table 1). As an  
356 initial method to detect knock-in events, we used PCR to amplify the predicted insertion  
357 sites from transfected cells. Using primers that are specific to the target gene and  
358 *mNeonGreen* sequence, we successfully amplified *gene-mNeonGreen* DNA fragments  
359 for all four genes (Figure 1B). Furthermore, next-generation sequencing of these  
360 amplified fragments revealed that 34-50% of sense-orientation insertions are in frame  
361 with the target gene (Figure 1B, Supplemental Figure 1, Supplemental Table 1).

362 Next, we measured mNeonGreen fluorescence in transfected S2R<sup>+</sup> cells as a  
363 more direct method of quantifying the frequency of in-frame knock-ins. Flow cytometry-  
364 based cell counting of transfected cells revealed that the number of mNeonGreen<sup>+</sup> cells  
365 range from 0.19-2.4% (Figure 1C, Supplemental Table 1), in agreement with published  
366 results in human cultured cells (SCHMID-BURGK *et al.* 2016). These results were  
367 confirmed by confocal analysis of transfected cells, which showed mNeonGreen  
368 fluorescence in a small subset of cells (Figure 1C). Analysis of confocal images of *Act5c*  
369 and *His2Av* samples showed that 3.2% and 2.4% of transfected cells expressed  
370 mNeonGreen (Figure 1C, Supplemental Table 1), which roughly agreed with flow  
371 cytometry cell counting. Finally, mNeonGreen localized to the expected subcellular  
372 compartments, most obviously observed by *His2Av*-mNeonGreen and Lam-  
373 mNeonGreen co-localization with the nucleus, and *Act5c*-mNeonGreen and alphasub-

374 mNeonGreen exclusion from the nucleus (Figure 1C). These results suggest that a  
375 significant number of transfected S2R+ cells received in-frame insertion of mNeonGreen  
376 at their C-terminus using the CRISPaint homology-independent insertion method.

377 For knock-in cells to be useful in experiments, it is important to derive cultures  
378 where most cells, if not all, carry the insertion. Therefore, we enriched for in-frame  
379 insertion events using Puromycin selection (Figure 1D). After a two-week incubation of  
380 transfected S2R+ cells with Puromycin, flow-cytometry and confocal analysis revealed  
381 that most cells express mNeonGreen and exhibit correct subcellular localization (Figure  
382 1E, Supplemental Table 1). For *alphaTub84B*, cell counting by flow-cytometry greatly  
383 underestimated the number of mNeonGreen+ cells counted by confocal analysis, likely  
384 because the mNeonGreen expression level was so low. Therefore, Puromycin selection  
385 is a fast and efficient method of selecting for mNeonGreen expressing knock-in cells  
386 after transfection.

387 A subset of cells in Puro-selected cultures had no mNeonGreen expression or  
388 unexpected localization (Figure 1E). Since each culture is composed of different cells  
389 with independent insertion events, we used FACs to derive single-cell cloned lines  
390 expressing mNeonGreen for further characterization (Figure 2A). At least 14 single-cell  
391 cloned lines were isolated for each target gene and imaged by confocal microscopy.  
392 Within a given clonal culture, every cell exhibited the same mNeonGreen localization  
393 (Figure 2B), confirming our single-cell cloning approach and demonstrating that the  
394 insertion is genetically stable over many cell divisions. Importantly, while many clones  
395 exhibited the predicted mNeonGreen localization, a subset of the clonal cell lines  
396 displayed an unusual localization pattern (Figure 2B). For example, three *Act5c-*  
397 *mNeonGreen* clones had localization in prominent rod structures, and 12 *Lamin-*  
398 *mNeonGreen* clones had asymmetric localization in the nuclear envelope (Figure 2B).



399 In addition, some clones had diffuse mNeonGreen localization in the cytoplasm and  
400 nucleus (Figure 2B).

401 To better characterize the insertions in single cell-cloned lines, we further  
402 analyzed three clones per gene (12 total), selecting different classes when possible  
403 (correct localization, unusual localization, and diffuse localization) (Supplemental Table  
404 2). Using PCR amplification of the predicted insertion site (Figure 1A, Figure 2C) and  
405 sequencing of amplified fragments (Supplemental Table 2), we determined that all  
406 clones with correct or unusual mNeonGreen localization contained an in-frame insertion  
407 of mNeonGreen with the target gene. In contrast, we were unable to amplify DNA  
408 fragments from the expected insertion site in clones with diffuse mNeonGreen  
409 localization (Figure 2C). Western blotting of cell lysates confirmed that only clones with  
410 in-frame mNeonGreen insertion express fusion proteins that match the predicted  
411 molecular weights (Figure 2D). All together, these results suggest that clones with  
412 correct mNeonGreen localization are likely to contain an in-frame insert in the correct  
413 target gene.

414 Since S2R+ cells are polyploid (LEE *et al.* 2014), clones expressing mNeonGreen  
415 could bear one or more insertions. Furthermore, in/dels induced at the non-insertion  
416 locus could disrupt protein function. To explore these possibilities, we amplified the non-  
417 insertion locus in our single-cell cloned lines and used Sanger and next-generation  
418 sequencing to analyze the DNA fragments (Figure 2C, Supplemental Table 2). For each  
419 gene, we could find in/dels occurring at the non-insertion sgRNA cut site. For example,  
420 we could distinguish four distinct alleles in clone B11: a 3bp deletion, a 2bp deletion, a  
421 1bp deletion, and a 27bp deletion. In addition, we identified an unusual mutation in  
422 clone C6, where a 1482bp DNA fragment inserted at the sgRNA cut site, which  
423 corresponds to a region from *alphatub84D*. We assume that this large insertion was

424 caused by homologous recombination, since *alphatub84D* and *alphatub84B* share 92%  
425 genomic sequence identity (Flybase). For *Act5c-mNeonGreen* clones A5 and A19,  
426 numerous in/del sequences were found, suggesting this region has an abnormal  
427 number of gene copies. We were unable to amplify a DNA fragment from *Lam-*  
428 *mNeonGreen* D9, despite follow-up PCRs using primers that bind genomic sequence  
429 further away from the insertion site (not shown).

430 One useful application of cell lines with fluorescently tagged endogenous  
431 proteins is to track their localization over time. Therefore, we used live confocal imaging  
432 of our single-cell cloned lines to capture mNeonGreen localization during cell division  
433 (Figure 2E, Supplemental Videos). Time-lapse images of dividing cells showed that  
434 Act5c-mNeonGreen localized to rod structures that asymmetrically or symmetrically  
435 distribute into daughter cells, His2Av-mNeonGreen localized to chromosomes that  
436 segregate into daughter cells, Lam-mNeonGreen showed disassembly and reassembly  
437 at the nuclear envelope, and alphaTub84B-mNeonGreen localized to mitotic spindles.  
438 These results demonstrate the usefulness of knock-in *Drosophila* cell lines to track the  
439 dynamic localization of endogenous proteins.

440

#### 441 ***In vivo* germ line knock-in of T2A-Gal4 into endogenous genes using homology-** 442 **independent insertion**

443

444 We next tested if homology-independent insertion could function in the  
445 *Drosophila* germ line for the purpose of generating knock-in fly strains. Compared to  
446 cultured cells, the isolation of flies bearing insertions that are in-frame with endogenous  
447 genes required additional considerations. As opposed to antibiotic selection, visible  
448 markers are commonly used to identify transgenic animals. In addition, since some

449 genes are expressed at low levels, target gene expression of an inserted reporter  
450 element may be insufficient to identify in-frame insertion events.

451 To overcome these issues, we constructed the donor plasmid *pCRISPaint-T2A-*  
452 *Gal4-3xP3-RFP* (Figure 3A). This donor contains a frame-selector sgRNA target site  
453 upstream of the reporter gene *T2A-Gal4*, which encodes a form of the transcription  
454 factor Gal4 that is cleaved from tagged endogenous protein (DIAO AND WHITE 2012).  
455 Insertion of this element in-frame with genomic coding sequence would result in Gal4  
456 translation, which can be detected using a *UAS-reporter* transgene (BRAND AND  
457 PERRIMON 1993). In addition, this donor plasmid contains a *3xP3-RFP* selectable marker  
458 gene that expresses bright red fluorescence in *Drosophila* larval tissues and the adult  
459 eye (BERGHAMMER *et al.* 1999; GRATZ *et al.* 2014) (Figure 3B). Importantly, the  
460 expression of *3xP3-RFP* is not dependent on in-frame insertion with the target gene.

461 Next, we tested for *pCRISPaint-T2A-Gal4-3xP3-RFP* insertion into 11  
462 endogenous genes (Supplemental Table 3). These genes were selected based on their  
463 known expression pattern, expression levels, or loss of function phenotype.  
464 Furthermore, we targeted *pCRISPaint-T2A-Gal4-3xP3-RFP* to insert into the 5' portion  
465 of the coding sequence (Figure 3A). This insertion location is designed to disrupt the  
466 protein product by premature truncation. Plasmid mixes were injected into *nos-Cas9*  
467 embryos, the resulting G0 progeny were outcrossed to *yw*, and G1 adults were  
468 screened for RFP fluorescence (Figure 3C). Each RFP+ founder fly was outcrossed to  
469 an appropriate balancer stock to establish a stable line. Figure 3D and Supplemental  
470 Table 3 shows the integration efficiency results for each gene and Supplemental Table  
471 4 has information on each balanced RFP+ line. From this data, we find that the  
472 frequency of G0 crosses yielding RFP+ G1 progeny varies between 5% and 21%  
473 (Figure 3D, Supplemental Table 3). For example, when targeting *ebony* with *pFP545*, 3

474 out of 16 G0 crosses produced  $\geq 1$  RFP+ G1 flies. Therefore, the *pCRISPaint-T2A-Gal4-*  
475 *3xP3-RFP* donor can insert into the genome of germ line cells in a homology-  
476 independent manner.

477 To gain insight into the genomic location of the insertions in our RFP+ lines, we  
478 first analyzed them by simple genetic crosses. During the fly stock balancing process,  
479 we determined that each insertion was located on the intended chromosome  
480 (Supplemental Table 4). In addition, flies that were homozygous for the insertion  
481 exhibited known phenotypes. For example, homozygous insertions in *ebony* produced  
482 flies with dark cuticle pigment (Figure 3E). Furthermore, flies with insertions targeting  
483 *wg*, *Mhc*, *hh*, and *esg* were homozygous lethal, which is consistent with known loss of  
484 function mutations in these genes (Supplemental Table 4). To test if the lethality of flies  
485 with homozygous insertions was due to on- or off-target gene disruption, we performed  
486 complementation tests by crossing RFP+ insertion lines with lines containing a known  
487 loss of function allele or genomic deletion spanning the gene. In all cases tested, trans-  
488 heterozygous combinations were lethal (Supplemental Table 4). Together, these results  
489 suggest that the *pCRISPaint-T2A-Gal4-3xP3-RFP* donor plasmid inserted into the  
490 intended target genes.

491 For T2A-Gal4 to be expressed by the target gene, the linearized donor plasmid  
492 must insert in the sense orientation relative to the target gene and in-frame with the  
493 coding sequence. As an initial screen for such events, we crossed RFP+ lines to a *UAS-*  
494 *GFP* line and assayed progeny for fluorescence. Through this approach, we identified  
495 Gal4-expressing lines for *ebony*, *myo1a*, *wg*, and *Mhc* (Figure 4A, Supplemental Tables  
496 3, 4). *wg-T2A-Gal4* (#1 and 4), *Mhc-T2A-Gal4* (#1 and 2), and *Myo1a-T2A-Gal4* (#1)  
497 insertions express in the imaginal disc, larval muscle, and larval gut (Figure 4A),  
498 respectively, which matches the known expression patterns for these genes.

499 Furthermore, *wg-T2A-Gal4 #1 and #4* insertions were expressed in a distinctive Wg  
500 pattern in the wing disc pouch (Figure 4B). The expression pattern of *ebony* is less well  
501 understood. We find that *ebony-T2A-Gal4 pFP545 #2* is expressed in the larval brain  
502 (Figure 4A) and throughout the pupal body (Figure 4C), which is consistent with a  
503 previous study (HOVEMANN *et al.* 1998). However, *ebony-T2A-Gal4 pFP545 #2* is also  
504 expressed in the larval tracheal openings (Figure 4A), indicating that *ebony* may play a  
505 role in this tissue.

506 Next, we analyzed the insertion orientation and sequence structure in the RFP+  
507 lines that express Gal4. We PCR amplified a region flanking the predicted insertion site  
508 from genomic DNA using primer pairs to distinguish sense and anti-sense insertions  
509 (Supplemental Figure 2). All RFP+ lines with Gal4 expression had insertions that were  
510 in the sense orientation (Supplemental Table 4, Supplemental Figure 2). Sequencing  
511 the resulting PCR fragments showed that the insert was present at the sgRNA cut site  
512 and each insertion contained an in/del between the target gene and *T2A-Gal4*  
513 sequence (Figure 4D). For example, *ebony-T2A-Gal4 pFP545 #2* contains a 15bp  
514 genomic deletion that is predicted to keep T2A-Gal4 in-frame with *ebony*. Similarly, *wg-*  
515 *T2A-Gal4 #1* contains an in-frame 45bp deletion and 21bp insertion. Remarkably, *wg-*  
516 *T2A-Gal4 #4* contains a frameshift in/del (Figure 4D), yet still expresses Gal4 in the Wg  
517 pattern, albeit at significantly lower levels than *wg-T2A-Gal4 #1* (Figure 4B). In similar  
518 cases, *Mhc-T2A-Gal4* lines #1, #2, and *Myo1a-T2A-Gal4 #1*, each have in/dels that put  
519 *T2A-Gal4* out of frame with the target gene coding sequence. These findings confirm  
520 that our Gal4-expressing lines have *T2A-Gal4* inserted in the correct gene and  
521 orientation, but that in-frame insertion with the target gene is not necessarily a  
522 requirement.

523 To better characterize the insertion events in our collection of RFP+ lines, we  
524 analyzed those that did not produce fluorescence when crossed with *UAS-GFP*  
525 (Supplemental Table 4, Supplemental Figures 2,3). Using PCR and sequencing  
526 analysis, we found that some lines contained insertions in the correct target site but in  
527 the anti-sense orientation. In addition, we identified lines with insertions in the sense  
528 orientation, but were out of frame relative to the target gene. Unexpectedly, we found  
529 that *wg-T2A-Gal4* #6 contained a sense orientation in-frame insertion. Yet, unlike *wg-*  
530 *T2A-Gal4* #1, *wg-T2A-Gal4* #6 does not express Gal4. Importantly, our molecular  
531 analysis of every independently isolated RFP+ line (20 in total) revealed that each  
532 contained an insertion in the intended target site (Supplemental Table 4, Supplemental  
533 Figures 2,3).

534 We did not obtain RFP+ insertions when targeting *ap*, *alphaTub84B*, *btl*, or  
535 *Desat1*. Therefore, we investigated whether the sgRNAs targeting these genes were  
536 functional. All 4 sgRNAs used for germ line knock-ins have an acceptable efficiency  
537 score of >5, with the exception of the sgRNA targeting *btl* (Supplemental Table 5). We  
538 tested whether the sgRNAs were functional in transfected S2R+ cells by performing a  
539 T7 endonuclease assay that detects in/dels at the cut site. This test revealed that  
540 sgRNAs targeting *ap*, *alphaTub84B*, *btl* can cut at the target site, whereas the results  
541 with *desat1* were inconclusive (Supplemental Figure 4A). As an alternative functional  
542 test, we used PCR to detect knock-in events in S2R+ cells transfected with the  
543 *pCRISPaint-T2A-Gal4-3xP3-RFP* donor plasmid. This showed that sgRNAs targeting  
544 *ap*, *alphaTub84B*, *btl* and *desat1* can successfully knock-in *pCRISPaint-T2A-Gal4-*  
545 *3xP3-RFP* (Supplemental Figure 4B). Finally, we sequenced the sgRNA target sites in  
546 the *nos-Cas9* fly strains and found a SNP in the *btl* sgRNA binding site (not shown). The  
547 10 remaining sgRNAs had no SNPs in the target site. In summary, we conclude that the

548 sgRNAs targeting *ap*, *alphaTub84B*, *btl*, and *Desat1* are able to induce cleavage at their  
549 target site in S2R+ cells, but that the sgRNA targeting *btl* will not function in the germ  
550 line using our *nos-Cas9* strains.

551

## 552 **A resource of CRISPaint donor plasmids for germ line knock-ins in Drosophila**

553

554 To facilitate the insertion of other sequences using the CRISPaint insertion  
555 method, we generated 10 additional donor plasmids based on the same architecture as  
556 *pCRISPaint-T2A-Gal4-3xP3-RFP* (Figure 5A). These include T2A-containing donors  
557 with sequence encoding the alternative binary reporters LexGAD, QF2, and split-Gal4,  
558 as well as Cas9 nuclease, FLP recombinase, Gal80 repression protein, NanoLuc  
559 luminescence reporter, and super-folder GFP. Like *T2A-Gal4*, these can be used to  
560 insert at 5' coding sequence, capturing endogenous gene expression and generating a  
561 loss-of function. In addition, we generated *pCRISPaint-sfGFP-3xP3-RFP*, which can be  
562 used to insert into 3' coding sequence, generating a C-terminal GFP fusion protein.

563 Several groups have demonstrated that coding sequence containing a splice  
564 acceptor (SA) and inserted in a gene intron can produce a protein trap with the  
565 preceding coding exon (MORIN *et al.* 2001; VENKEN *et al.* 2011). Recently, two studies  
566 produced *SA-T2A-Gal4* donor plasmids for intron insertion by HDR, called CRIMIC and  
567 T-GEM (DIAO *et al.* 2015; LEE *et al.* 2018). Therefore, we modified these two plasmids to  
568 contain a CRISPaint target site upstream of the splice acceptor (Figure 5B).

569

## 570 **Discussion**

571

572           The insertion of large DNA elements into the genome by HDR requires a great  
573 deal of expertise and labor for the design and construction of donor plasmids. Some  
574 groups have developed strategies to improve the efficiency and scale at which  
575 homology arms are cloned into donor plasmids (HOUSDEN *et al.* 2014; GRATZ *et al.*  
576 2015), but the root problem still remains. Furthermore, each new gene-specific donor  
577 plasmid requires the same amount of investment for their construction but is only used  
578 once to achieve the desired knock-in. For these reasons, we believe that the current  
579 methods for knock-in by HDR may act as a barrier to achieving widespread use by the  
580 *Drosophila* community.

581           In this study, we addressed these challenges by demonstrating that large DNA  
582 elements can insert into the *Drosophila* genome by a homology-independent  
583 mechanism, using the previously established CRISPaint system. This approach has two  
584 major advantages over HDR. 1) No construction of a donor plasmid is necessary, as  
585 long as a suitable CRISPaint-compatible donor plasmid already exists. The only unique  
586 reagent needed is an sgRNA that targets the endogenous gene (also required for HDR).  
587 Cloning sgRNAs into expression plasmids, such as *pCFD3* (PORT *et al.* 2014), is simple,  
588 fast, inexpensive, and works nearly every time. Furthermore, the availability of sgRNA-  
589 encoding plasmids from public resources (e.g. TRiP, Addgene), and synthesized  
590 sgRNA from commercial companies, means that researchers can increasingly order  
591 their sgRNAs. 2) CRISPaint-compatible donor plasmids are “universal” and thus  
592 modular. For example, different genes can be targeted by the same CRISPaint donor  
593 plasmid, and different CRISPaint donor plasmids can be targeted to the same gene.  
594 Publicly available collections of CRISPaint donor plasmids [(SCHMID-BURGK *et al.* 2016),  
595 this study] ensure that researchers only need to select their insert of choice. Indeed, the  
596 CRISPaint donor plasmids originally used for mammalian cell culture also function in



597 *Drosophila* S2R<sup>+</sup> cells (Figure 1) and the *3xP3-RFP* marker in our germ line donor  
598 plasmids is compatible with other insects (BERGHAMMER *et al.* 1999).

599 An important step in obtaining correctly targeted knock-ins is molecularly  
600 validating the candidate insertions. Confirming an HDR insertion requires amplifying a  
601 large DNA fragment (~1.5kb-2kb) that encompasses part of the insert, an entire  
602 homology arm, and a portion of genomic sequence flanking the homology arm. This is  
603 necessary to verify that the donor did not insert off-target. These PCRs can sometimes  
604 fail or give inconclusive results due to the large fragment size. In contrast, CRISPaint  
605 knock-ins are easier to characterize by PCR analysis and sequencing because the  
606 amplified region is relatively small (~200-800bp) (Figure 1B, Figure 2C, Supplemental  
607 Figures 2,4). However, CRISPaint knock-ins require more work to screen since they can  
608 insert in two directions and in/dels occur at the insertion site. When possible, we  
609 recommend that researchers select for insert expression before molecular validation.

610 In this study, we generated knock-ins by inserting the entire linearized CRISPaint  
611 donor plasmid into the target gene. Since the backbone contains bacterial sequences, it  
612 may cause transgene silencing or impact neighboring gene expression (CHEN *et al.*  
613 2004; SUZUKI *et al.* 2016). However, we note that thousands of transgenic fly lines  
614 contain bacterial sequences from phiC31 integration (PERKINS *et al.* 2015) with no  
615 reports of ill effects. Another issue is that insertion of the entire plasmid restricts the  
616 design of gene-tagging events to only append the insert 3' to the target insertion site.  
617 Different groups have used approaches that address these issues, such as providing  
618 donor plasmids as mini-circles (SCHMID-BURGK *et al.* 2016; SUZUKI *et al.* 2016), cutting  
619 donor plasmid twice to liberate the insert fragment (LACKNER *et al.* 2015; SUZUKI *et al.*  
620 2016), or using PCR amplified inserts (Manna *et al.* 2019 BioRxiv). The first two  
621 modifications could in theory be made to our germ-line donor plasmids (e.g.

622 *pCRISPaint-T2A-Gal4-3xP3-RFP*), but for this study we opted to establish the simplest  
623 protocol possible. Furthermore, we reasoned that cutting the donor twice would give rise  
624 to two donor fragments and this could reduce knock-in efficiency.

625         Using the CRISPaint method in S2R+ cells, we readily identified cell lines with  
626 endogenous proteins tagged with mNeonGreen at their C-terminus (Figure 2,  
627 Supplemental Table 2). However, some lines exhibited unusual or unexpected protein  
628 localization. In clones D6 and D9, Lamin-mNeonGreen localizes to the nuclear  
629 envelope, but in D9 this localization is enriched asymmetrically in the direction of the  
630 previous plane of cell division. Since these two clones contain the same seamless  
631 mNeonGreen insertion, we speculate that mutations at non-knock-in loci account for this  
632 difference. Indeed, clone D6 contained an in-frame 3bp deletion at the non-knock-in  
633 locus, likely retaining wild-type function, whereas D9 had no remaining non-knock-in  
634 locus. We saw a similar pattern for clones A3 and A5, where both had seamless  
635 mNeonGreen insertions in *Actin5c*, but clone A5 exhibited distinct rod structures.  
636 Finally, alphaTub84B-mNeonGreen fluorescence and protein levels were extremely low  
637 in all cell lines, despite *alphaTub84B* being highly expressed in S2R+ cells (Hu *et al.*  
638 2017). We speculate that the alphaTub84B-mNeonGreen fusion protein is unstable and  
639 previous studies in other organisms have highlighted problems with C-terminal tagging  
640 of alpha-Tubulin (CARMINATI AND STEARNS 1997). Similarly, C-terminal tags can disrupt  
641 Lamin and Actin function (DAVIES *et al.* 2009; NAGASAKI *et al.* 2017). These findings  
642 illustrate the need for experimenters to consider the existing knowledge of the protein  
643 when generating C-terminal protein fusions, and to carefully screen individual single cell  
644 cloned lines.

645 We constructed a CRISPaint-compatible *T2A-Gal4* donor plasmid for use in the  
646 fly germ line and successfully identified insertion lines. Our knock-in efficiency, defined  
647 by the percentage of injected G0 flies that give RFP+ progeny, ranged from 5-21%  
648 (Figure 3B, Supplemental Table 3), which is roughly similar to knock-in efficiencies  
649 observed when using HDR [5-22% (GRATZ *et al.* 2014), 46-88% (PORT *et al.* 2015), 7-  
650 42% (GRATZ *et al.* 2015)]. In addition, all 20 of our RFP+ fly lines, which encompass 8  
651 different sgRNA target sites, contain an insertion at the correct location. Though, we do  
652 not rule out the possibility of a second-site off-target event on the same chromosome.

653 To obtain *T2A-Gal4* insertions that express Gal4 under the control of the target  
654 gene (Figure 4), it was necessary to screen multiple independently derived insertions,  
655 due to the in/dels that occur at the insertion site and the two insertion orientations.  
656 However, we found for some genes the overall efficiencies were too low to obtain a  
657 successful Gal4-expressing line (*hh*, *esg*, *FK506-bp2*), or we did not obtain any RFP+  
658 insertions (*ap*, *alphaTub84B*, *btl*, and *Desat1*). Additional steps could be taken to  
659 improve insertion efficiency, such as optimization of the injected plasmid concentrations,  
660 increasing the number of injected embryos, or simply reattempting with a different  
661 sgRNA. It is also possible that certain insertions are toxic to cells/animals during G0  
662 germ-line development or in G1 progeny.

663 There were three unexpected findings with our germ-line insertions. First, some  
664 Gal4-expressing lines had *T2A-Gal4* inserted out of frame relative to the target gene.  
665 We speculate that it may be the result of ribosome frameshifting (KETTELER 2012), an  
666 internal ribosome entry site (IRES) (KOMAR AND HATZOGLOU 2005), or the presence of  
667 alternative open reading frames (altORFs) (MOUILLERON *et al.* 2016). However, we find  
668 no obvious evidence of these mechanisms by analyzing the sequence flanking *wg*, *Mhc*,  
669 and *Myo1a* insertion sites (not shown). Ultimately, we consider this a fortuitous effect as

670 long as Gal4 is expressed in the correct pattern. Second, we found an in-frame insertion  
671 in *wg* (#6) that that does not express Gal4. This finding highlights the importance of  
672 screening RFP+ insertions for Gal4 expression when possible. Third, we found that,  
673 unlike in cell culture, all of our RFP+ fly lines contain in/dels at the insertion site. Germ  
674 cells are known to differ in their NHEJ mechanisms compared to somatic cells (PRESTON  
675 *et al.* 2006; AHMED *et al.* 2015), but it is not clear why this would reduce the frequency of  
676 seamless insertions. Perhaps genetic or chemical manipulation of NHEJ regulators  
677 during embryo injection could address this issue in the future. This finding also suggests  
678 that the CRISPaint frame-selector approach may not be as useful in the fly germ line as  
679 it is in cell culture.

680 Our collection of donor plasmids (Figure 5) provides many options for inserting  
681 protein-coding sequence into target genes. However, other uses for homology-  
682 independent knock-in can be imagined, such as inserting enhancer sequences (e.g.  
683 *UAS*) upstream of endogenous genes to induce their overexpression (RORTH 1996), a  
684 reporter gene near non-coding regulatory sequences to capture the transcriptional  
685 expression pattern of neighboring genes (BRAND AND PERRIMON 1993), entire genes into  
686 intergenic sequence (SADELAIN *et al.* 2011), or sequences to be used for labeling DNA  
687 loci (ROBINETT *et al.* 1996). Furthermore, the donor plasmids described in this study  
688 could be used to simply knock out endogenous genes with a selectable marker. Indeed,  
689 all of our mNeonGreen-expressing single cell cloned lines contain mutations in the non-  
690 knock-in locus and our fly germ line insertions produced loss of function phenotypes.  
691 This approach could greatly increase the efficiency of selecting knock-out alleles, which  
692 are traditionally done by laborious PCR-based screening of frameshift in/dels. We also  
693 note that, similar to the *T2A-Gal4* reporters in vivo, cell lines could be targeted with  
694 translational reporters such as NanoLuciferase or GFP. Finally, since our collection of

695 CRISPaint donor plasmids contain enzyme restriction sites that flank the insert  
696 sequence, they are also useful as parental vectors for constructing traditional HDR  
697 donor plasmids.

698 In summary, our homology-independent knock-in approach enables researchers  
699 to focus more effort on screening for correct insertions in cells or flies than on designing  
700 and constructing donor plasmids. Furthermore, the techniques required for screening  
701 knock-ins are less specialized than those for constructing donor plasmids, making this  
702 trade off potentially attractive for labs with less molecular biology expertise or resources.  
703 Therefore, we hope that this method will put knock-in technology into the hands of more  
704 researchers due to its simplicity.

705

## 706 **Acknowledgements**

707

708 We thank Jonathan Schmid-Burgk for advice and the *CRISPaint-mNeonGreen* donor  
709 plasmid, Claire Hu and the TRiP for sgRNA design and construction, Ben Ewen-  
710 Campen for valuable comments on the manuscript, Stephanie Mohr, Oguz Kanca, and  
711 Hugo Bellen for helpful discussions, Raghuvir Viswanatha for the *Cas9-T2A-EGFP*  
712 template sequence, and Rich Binari and Cathryn Murphy for general assistance. J.A.B.  
713 was supported by the Damon Runyon Foundation. This work was supported by NIH  
714 grants R01GM084947, R01GM067761, R24OD019847. N.P. is an investigator of the  
715 Howard Hughes Medical Institute.

716

## 717 **References:**

718

- 719 Ahmed, E. A., H. Scherthan and D. G. de Rooij, 2015 DNA Double Strand Break  
720 Response and Limited Repair Capacity in Mouse Elongated Spermatids. *Int J*  
721 *Mol Sci* 16: 29923-29935.
- 722 Auer, T. O., K. Duroure, A. De Cian, J. P. Concordet and F. Del Bene, 2014 Highly  
723 efficient CRISPR/Cas9-mediated knock-in in zebrafish by homology-independent  
724 DNA repair. *Genome Res* 24: 142-153.
- 725 Bassett, A. R., C. Tibbit, C. P. Ponting and J. L. Liu, 2014 Mutagenesis and homologous  
726 recombination in *Drosophila* cell lines using CRISPR/Cas9. *Biol Open* 3: 42-49.
- 727 Bellen, H. J., R. W. Levis, Y. He, J. W. Carlson, M. Evans-Holm *et al.*, 2011 The  
728 *Drosophila* gene disruption project: progress using transposons with distinctive  
729 site specificities. *Genetics* 188: 731-743.
- 730 Berghammer, A. J., M. Klingler and E. A. Wimmer, 1999 A universal marker for  
731 transgenic insects. *Nature* 402: 370-371.
- 732 Bier, E., M. M. Harrison, K. M. O'Connor-Giles and J. Wildonger, 2018 Advances in  
733 Engineering the Fly Genome with the CRISPR-Cas System. *Genetics* 208: 1-18.
- 734 Bosch, J. A., N. H. Tran and I. K. Hariharan, 2015 CoinFLP: a system for efficient  
735 mosaic screening and for visualizing clonal boundaries in *Drosophila*.  
736 *Development* 142: 597-606.
- 737 Bottcher, R., M. Hollmann, K. Merk, V. Nitschko, C. Obermaier *et al.*, 2014 Efficient  
738 chromosomal gene modification with CRISPR/cas9 and PCR-based homologous  
739 recombination donors in cultured *Drosophila* cells. *Nucleic Acids Res* 42: e89.
- 740 Bouabe, H., and K. Okkenhaug, 2013 Gene targeting in mice: a review. *Methods Mol*  
741 *Biol* 1064: 315-336.
- 742 Brand, A. H., and N. Perrimon, 1993 Targeted gene expression as a means of altering  
743 cell fates and generating dominant phenotypes. *Development* 118: 401-415.
- 744 Carminati, J. L., and T. Stearns, 1997 Microtubules orient the mitotic spindle in yeast  
745 through dynein-dependent interactions with the cell cortex. *J Cell Biol* 138: 629-  
746 641.
- 747 Chen, Z. Y., C. Y. He, L. Meuse and M. A. Kay, 2004 Silencing of episomal transgene  
748 expression by plasmid bacterial DNA elements in vivo. *Gene Ther* 11: 856-864.
- 749 Clement, K., H. Rees, M. C. Canver, J. M. Gehrke, R. Farouni *et al.*, 2019  
750 CRISPResso2 provides accurate and rapid genome editing sequence analysis.  
751 *Nat Biotechnol* 37: 224-226.
- 752 Cristea, S., Y. Freyvert, Y. Santiago, M. C. Holmes, F. D. Urnov *et al.*, 2013 In vivo  
753 cleavage of transgene donors promotes nuclease-mediated targeted integration.  
754 *Biotechnol Bioeng* 110: 871-880.
- 755 Crivat, G., and J. W. Taraska, 2012 Imaging proteins inside cells with fluorescent tags.  
756 *Trends Biotechnol* 30: 8-16.
- 757 Davies, B. S., L. G. Fong, S. H. Yang, C. Coffinier and S. G. Young, 2009 The  
758 posttranslational processing of prelamin A and disease. *Annu Rev Genomics*  
759 *Hum Genet* 10: 153-174.
- 760 Diao, F., H. Ironfield, H. Luan, F. Diao, W. C. Shropshire *et al.*, 2015 Plug-and-play  
761 genetic access to *drosophila* cell types using exchangeable exon cassettes. *Cell*  
762 *Rep* 10: 1410-1421.
- 763 Diao, F., and B. H. White, 2012 A novel approach for directing transgene expression in  
764 *Drosophila*: T2A-Gal4 in-frame fusion. *Genetics* 190: 1139-1144.
- 765 Gratz, S. J., C. D. Rubinstein, M. M. Harrison, J. Wildonger and K. M. O'Connor-Giles,  
766 2015 CRISPR-Cas9 Genome Editing in *Drosophila*. *Curr Protoc Mol Biol* 111: 31  
767 32 31-20.

- 768 Gratz, S. J., F. P. Ukken, C. D. Rubinstein, G. Thiede, L. K. Donohue *et al.*, 2014 Highly  
769 specific and efficient CRISPR/Cas9-catalyzed homology-directed repair in  
770 *Drosophila*. *Genetics* 196: 961-971.
- 771 Hasse, S., A. A. Hyman and M. Sarov, 2016 TransgeneOmics--A transgenic platform for  
772 protein localization based function exploration. *Methods* 96: 69-74.
- 773 Housden, B. E., S. Lin and N. Perrimon, 2014 Cas9-based genome editing in  
774 *Drosophila*. *Methods Enzymol* 546: 415-439.
- 775 Housden, B. E., M. Muhar, M. Gemberling, C. A. Gersbach, D. Y. Stainier *et al.*, 2017  
776 Loss-of-function genetic tools for animal models: cross-species and cross-  
777 platform differences. *Nat Rev Genet* 18: 24-40.
- 778 Hovemann, B. T., R. P. Ryseck, U. Walldorf, K. F. Stortkuhl, I. D. Dietzel *et al.*, 1998  
779 The *Drosophila* ebony gene is closely related to microbial peptide synthetases  
780 and shows specific cuticle and nervous system expression. *Gene* 221: 1-9.
- 781 Hu, Y., A. Comjean, N. Perrimon and S. E. Mohr, 2017 The *Drosophila* Gene  
782 Expression Tool (DGET) for expression analyses. *BMC Bioinformatics* 18: 98.
- 783 Ivics, Z., M. A. Li, L. Mates, J. D. Boeke, A. Nagy *et al.*, 2009 Transposon-mediated  
784 genome manipulation in vertebrates. *Nat Methods* 6: 415-422.
- 785 Kanca, O., H. J. Bellen and F. Schnorrer, 2017 Gene Tagging Strategies To Assess  
786 Protein Expression, Localization, and Function in *Drosophila*. *Genetics* 207: 389-  
787 412.
- 788 Katic, I., L. Xu and R. Ciosk, 2015 CRISPR/Cas9 Genome Editing in *Caenorhabditis*  
789 *elegans*: Evaluation of Templates for Homology-Mediated Repair and Knock-Ins  
790 by Homology-Independent DNA Repair. *G3 (Bethesda)* 5: 1649-1656.
- 791 Katoh, Y., S. Michisaka, S. Nozaki, T. Funabashi, T. Hirano *et al.*, 2017 Practical  
792 method for targeted disruption of cilia-related genes by using CRISPR/Cas9-  
793 mediated, homology-independent knock-in system. *Mol Biol Cell* 28: 898-906.
- 794 Ketteler, R., 2012 On programmed ribosomal frameshifting: the alternative proteomes.  
795 *Front Genet* 3: 242.
- 796 Kimple, M. E., A. L. Brill and R. L. Pasker, 2013 Overview of affinity tags for protein  
797 purification. *Curr Protoc Protein Sci* 73: Unit 9 9.
- 798 Komar, A. A., and M. Hatzoglou, 2005 Internal ribosome entry sites in cellular mRNAs:  
799 mystery of their existence. *J Biol Chem* 280: 23425-23428.
- 800 Kondo, S., and R. Ueda, 2013 Highly improved gene targeting by germline-specific  
801 Cas9 expression in *Drosophila*. *Genetics* 195: 715-721.
- 802 Korona, D., S. A. Koestler and S. Russell, 2017 Engineering the *Drosophila* Genome for  
803 Developmental Biology. *J Dev Biol* 5.
- 804 Lackner, D. H., A. Carre, P. M. Guzzardo, C. Banning, R. Mangena *et al.*, 2015 A  
805 generic strategy for CRISPR-Cas9-mediated gene tagging. *Nat Commun* 6:  
806 10237.
- 807 Lee, H., C. J. McManus, D. Y. Cho, M. Eaton, F. Renda *et al.*, 2014 DNA copy number  
808 evolution in *Drosophila* cell lines. *Genome Biol* 15: R70.
- 809 Lee, P. T., J. Zirin, O. Kanca, W. W. Lin, K. L. Schulze *et al.*, 2018 A gene-specific T2A-  
810 GAL4 library for *Drosophila*. *Elife* 7.
- 811 Maresca, M., V. G. Lin, N. Guo and Y. Yang, 2013 Obligate ligation-gated  
812 recombination (ObLiGaRe): custom-designed nuclease-mediated targeted  
813 integration through nonhomologous end joining. *Genome Res* 23: 539-546.
- 814 Morin, X., R. Daneman, M. Zavortink and W. Chia, 2001 A protein trap strategy to  
815 detect GFP-tagged proteins expressed from their endogenous loci in *Drosophila*.  
816 *Proc Natl Acad Sci U S A* 98: 15050-15055.

- 817 Moulleron, H., V. Delcourt and X. Roucou, 2016 Death of a dogma: eukaryotic mRNAs  
818 can code for more than one protein. *Nucleic Acids Res* 44: 14-23.
- 819 Nagasaki, A., T. K. S, T. Yumoto, M. Imaizumi, A. Yamagishi *et al.*, 2017 The Position  
820 of the GFP Tag on Actin Affects the Filament Formation in Mammalian Cells. *Cell*  
821 *Struct Funct* 42: 131-140.
- 822 Perkins, L. A., L. Holderbaum, R. Tao, Y. Hu, R. Sopko *et al.*, 2015 The Transgenic  
823 RNAi Project at Harvard Medical School: Resources and Validation. *Genetics*  
824 201: 843-852.
- 825 Port, F., H. M. Chen, T. Lee and S. L. Bullock, 2014 Optimized CRISPR/Cas tools for  
826 efficient germline and somatic genome engineering in *Drosophila*. *Proc Natl Acad*  
827 *Sci U S A* 111: E2967-2976.
- 828 Port, F., N. Muschalik and S. L. Bullock, 2015 Systematic Evaluation of *Drosophila*  
829 CRISPR Tools Reveals Safe and Robust Alternatives to Autonomous Gene  
830 Drives in Basic Research. *G3 (Bethesda)* 5: 1493-1502.
- 831 Preston, C. R., C. C. Flores and W. R. Engels, 2006 Differential usage of alternative  
832 pathways of double-strand break repair in *Drosophila*. *Genetics* 172: 1055-1068.
- 833 Quadros, R. M., H. Miura, D. W. Harms, H. Akatsuka, T. Sato *et al.*, 2017 Easi-CRISPR:  
834 a robust method for one-step generation of mice carrying conditional and  
835 insertion alleles using long ssDNA donors and CRISPR ribonucleoproteins.  
836 *Genome Biol* 18: 92.
- 837 Ren, X., J. Sun, B. E. Housden, Y. Hu, C. Roesel *et al.*, 2013 Optimized gene editing  
838 technology for *Drosophila melanogaster* using germ line-specific Cas9. *Proc Natl*  
839 *Acad Sci U S A* 110: 19012-19017.
- 840 Robinett, C. C., A. Straight, G. Li, C. Willhelm, G. Sudlow *et al.*, 1996 In vivo localization  
841 of DNA sequences and visualization of large-scale chromatin organization using  
842 lac operator/repressor recognition. *J Cell Biol* 135: 1685-1700.
- 843 Rorth, P., 1996 A modular misexpression screen in *Drosophila* detecting tissue-specific  
844 phenotypes. *Proc Natl Acad Sci U S A* 93: 12418-12422.
- 845 Sadelain, M., E. P. Papapetrou and F. D. Bushman, 2011 Safe harbours for the  
846 integration of new DNA in the human genome. *Nat Rev Cancer* 12: 51-58.
- 847 Schmid-Burgk, J. L., K. Honing, T. S. Ebert and V. Hornung, 2016 CRISPaint allows  
848 modular base-specific gene tagging using a ligase-4-dependent mechanism. *Nat*  
849 *Commun* 7: 12338.
- 850 Suzuki, K., Y. Tsunekawa, R. Hernandez-Benitez, J. Wu, J. Zhu *et al.*, 2016 In vivo  
851 genome editing via CRISPR/Cas9 mediated homology-independent targeted  
852 integration. *Nature* 540: 144-149.
- 853 Venken, K. J., A. Sarrion-Perdigones, P. J. Vandeventer, N. S. Abel, A. E. Christiansen  
854 *et al.*, 2016 Genome engineering: *Drosophila melanogaster* and beyond. *Wiley*  
855 *Interdiscip Rev Dev Biol* 5: 233-267.
- 856 Venken, K. J., K. L. Schulze, N. A. Haelterman, H. Pan, Y. He *et al.*, 2011 MiMIC: a  
857 highly versatile transposon insertion resource for engineering *Drosophila*  
858 *melanogaster* genes. *Nat Methods* 8: 737-743.
- 859 Viswanatha, R., Z. Li, Y. Hu and N. Perrimon, 2018 Pooled genome-wide CRISPR  
860 screening for basal and context-specific fitness gene essentiality in *Drosophila*  
861 cells. *Elife* 7.
- 862 Yu, Z., M. Ren, Z. Wang, B. Zhang, Y. S. Rong *et al.*, 2013 Highly efficient genome  
863 modifications mediated by CRISPR/Cas9 in *Drosophila*. *Genetics* 195: 289-291.
- 864



**Figure 1**

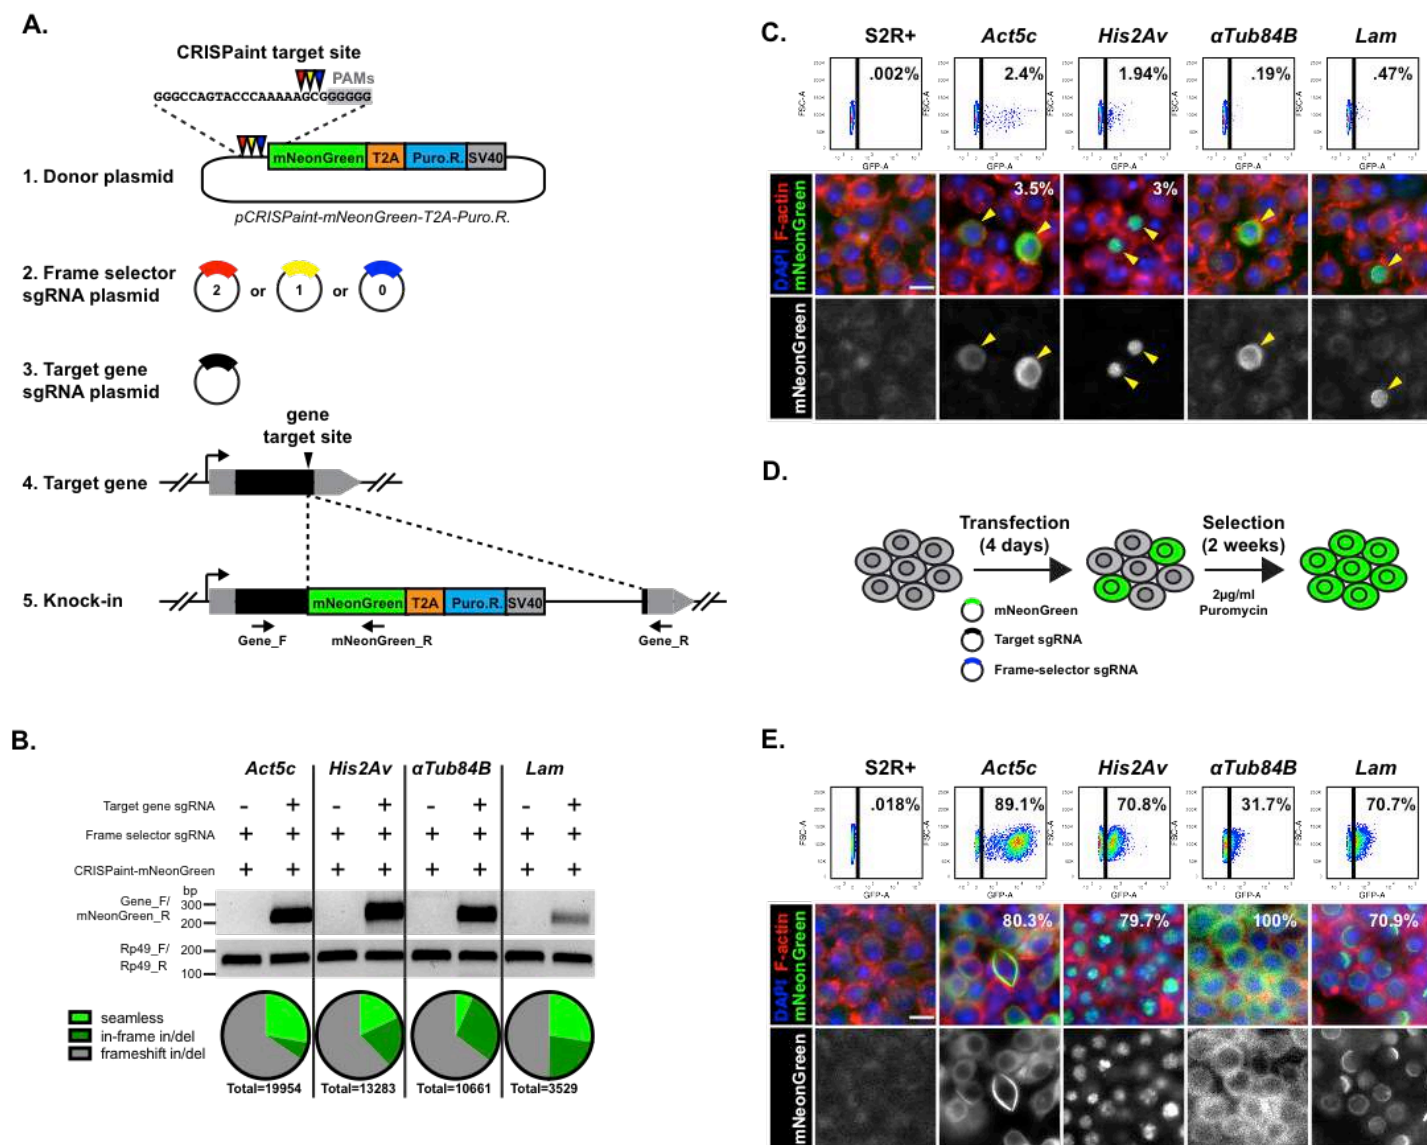

**Figure 1 – Knock-in of *mNeonGreen-T2A-PuroR* into *Drosophila* S2R+ cells using homology-independent insertion. (A) Schematic of CRISPaint knock-in approach. *mNeonGreen-T2A-PuroR* is inserted into 3' coding sequence. (B) Analysis of knock-in efficiency of transfected cells by diagnostic PCR (DNA gel image) and next-generation sequencing (pie charts). (C) Analysis of knock-in efficiency of transfected cells by FACS and confocal microscopy. Numbers indicate percentage of cells with fluorescence. F-actin stained using Phalloidin-TRITC (red), nuclei labeled with DAPI (blue), *mNeonGreen* signal is in green. Scale bar 10µm. (D) Schematic of Puromycin selection of *mNeonGreen*-expressing cells. (E) Analysis of knock-in frequency of puromycin-selected cells using FACS and confocal microscopy. Numbers indicate percentage of cells with green fluorescence. Scale bar 10µm.**

## Figure 2

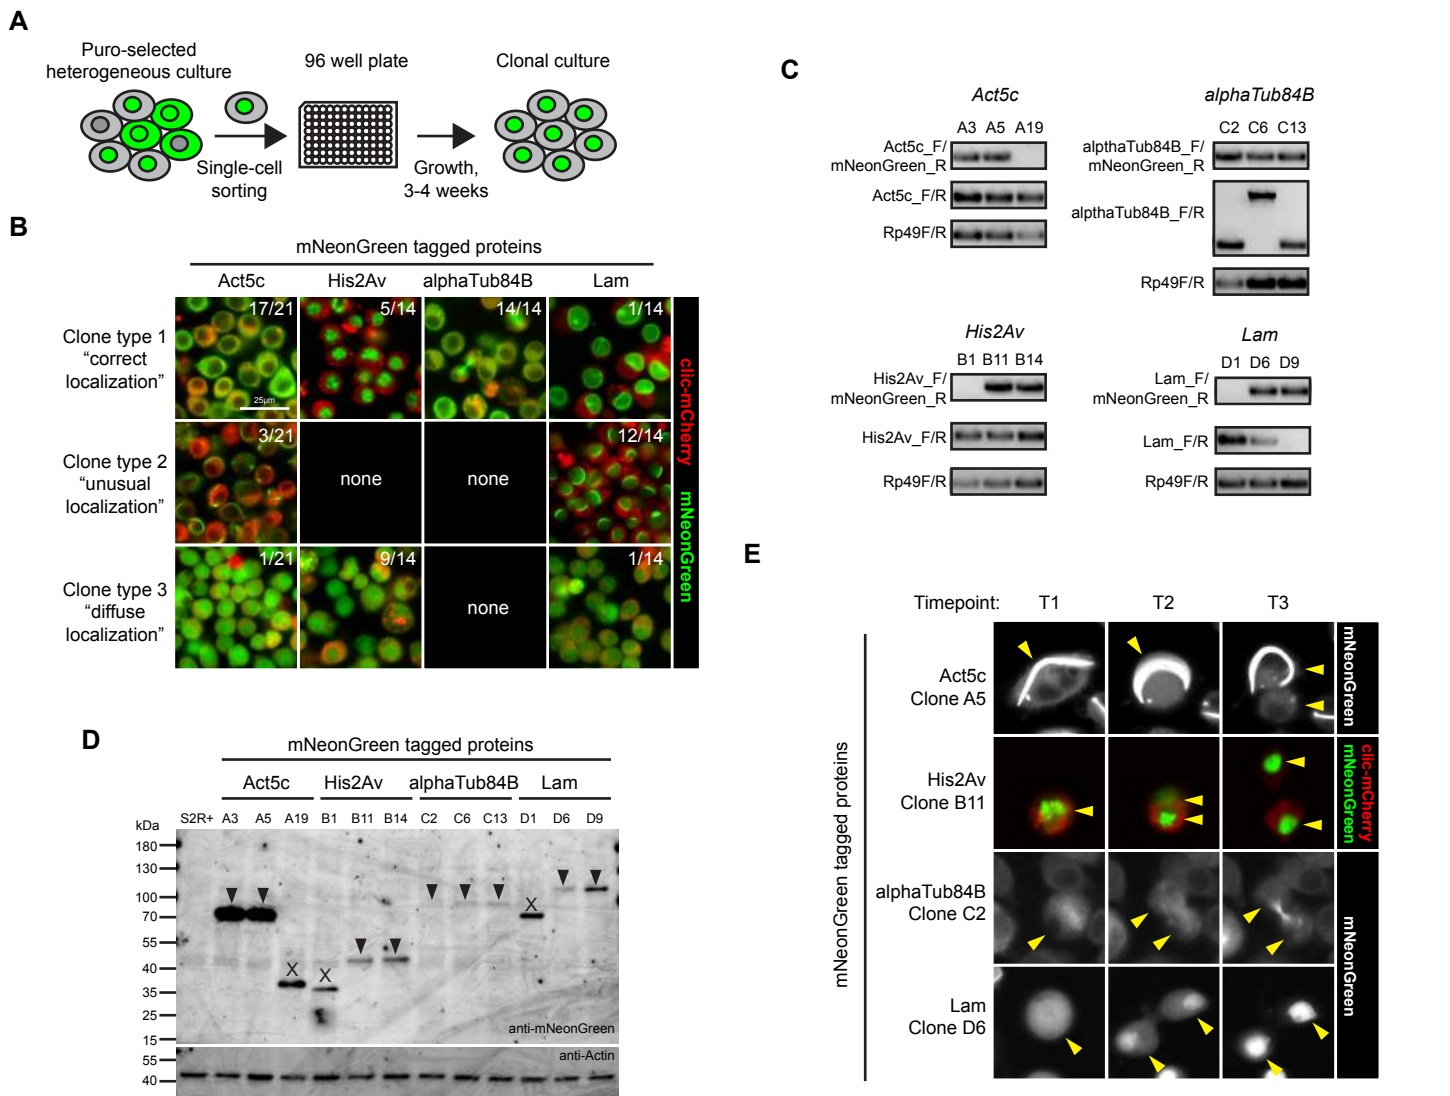

**Figure 2. Analysis of S2R+ mNeonGreen-expressing single-cell cloned lines. (A)** Schematic of FACS isolation of single-cell clones expressing mNeonGreen. **(B)** Confocal images of live mNeonGreen-expressing cell lines, categorized into three clone types. Numbers indicate the frequency of each clone type for each gene targeted. Images show fluorescence from Clic-mCherry (red) and mNeonGreen (green). Scale bar 25µm. **(C)** Agarose gel with PCR fragments amplified from knock-in (Gene\_F/mNeonGreen\_R) and non-knock-in loci (Gene\_F/R). Positive control bands were amplified from *Rp49* genomic sequence. **(D)** Western blot detecting mNeonGreen protein fusions. Arrowheads indicate expected molecular weight. X's indicate incorrect molecular weight. **(E)** Confocal images of live S2R+ cells expressing mNeonGreen protein fusions during cell division at three timepoints. Arrowheads indicate cells before/after cell division.

**Figure 3**

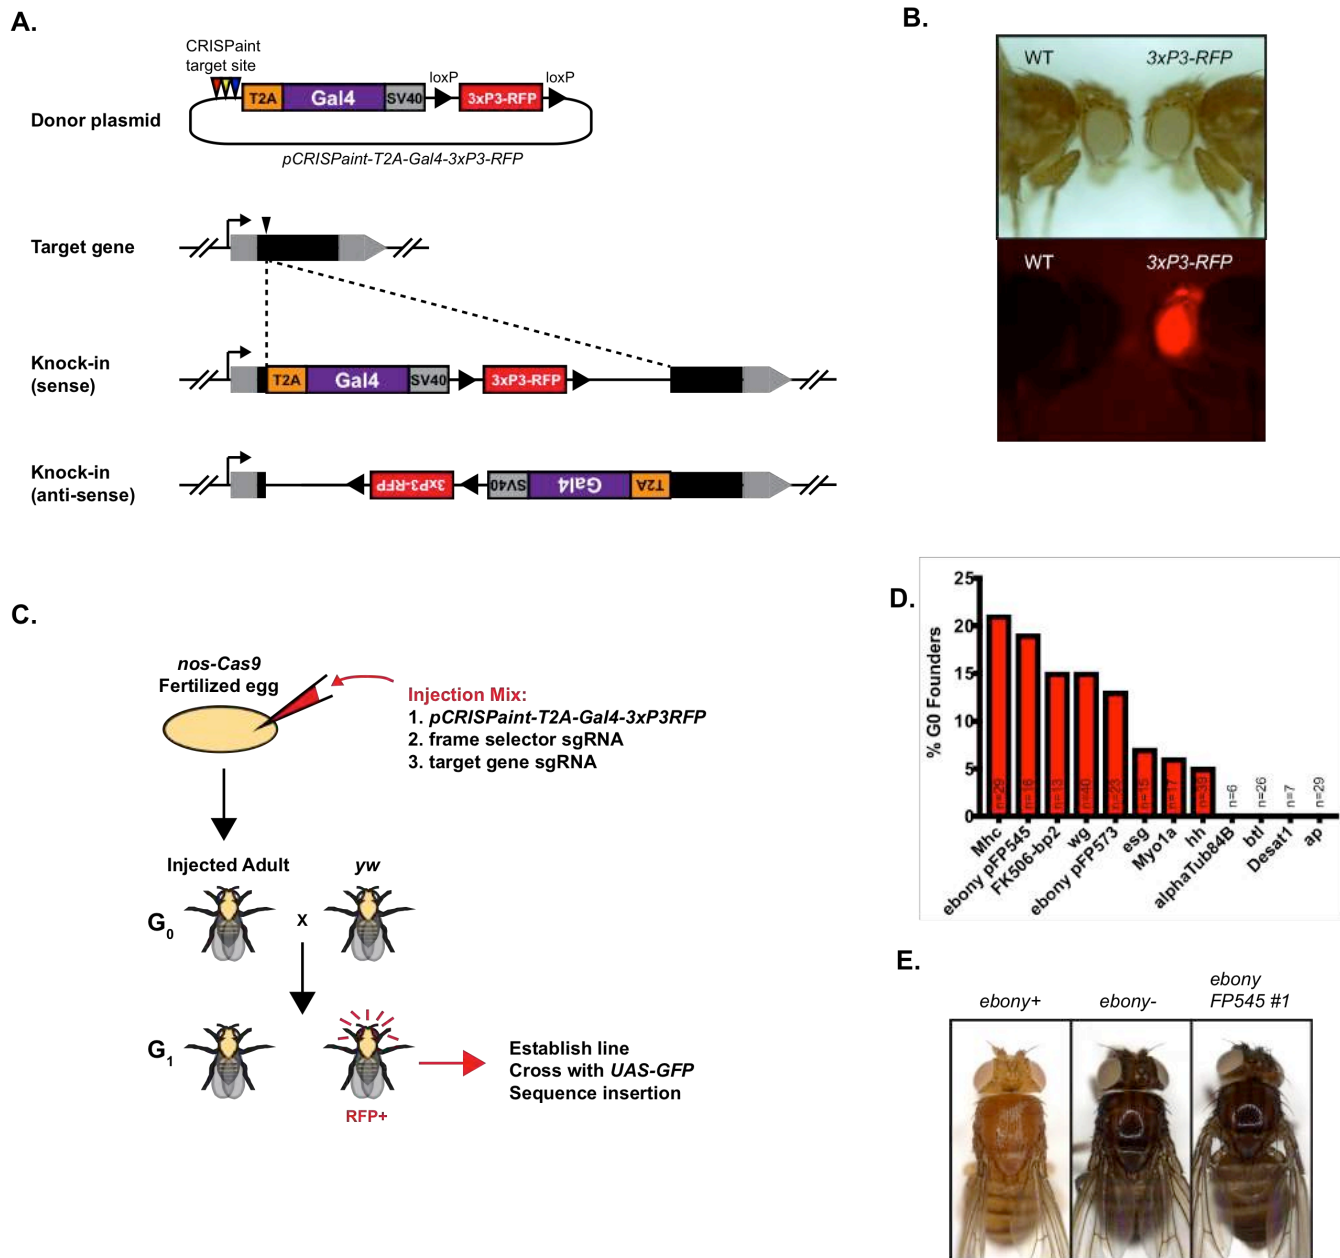

**Figure 3 – Knock-in of *T2A-Gal4* into the *Drosophila* germ line using homology-independent insertion. (A) Schematic of knock-in approach. *pCRISPaint-T2A-Gal4-3xP3-RFP* is inserted into 5' coding sequence. (B) Images of adult flies with 3xP3-RFP fluorescence in the eye. Top panel is brightfield, bottom panel is fluorescence. (C) Schematic of plasmid injections, fly crosses, and analysis of insertions. (D) Graph with results of knock-in efficiency for 12 sgRNA target sites and 11 genes. (E) Image of adult flies. Homozygous *ebony-T2A-Gal4 FP545 #1* flies have dark cuticle pigment.**

**Figure 4**

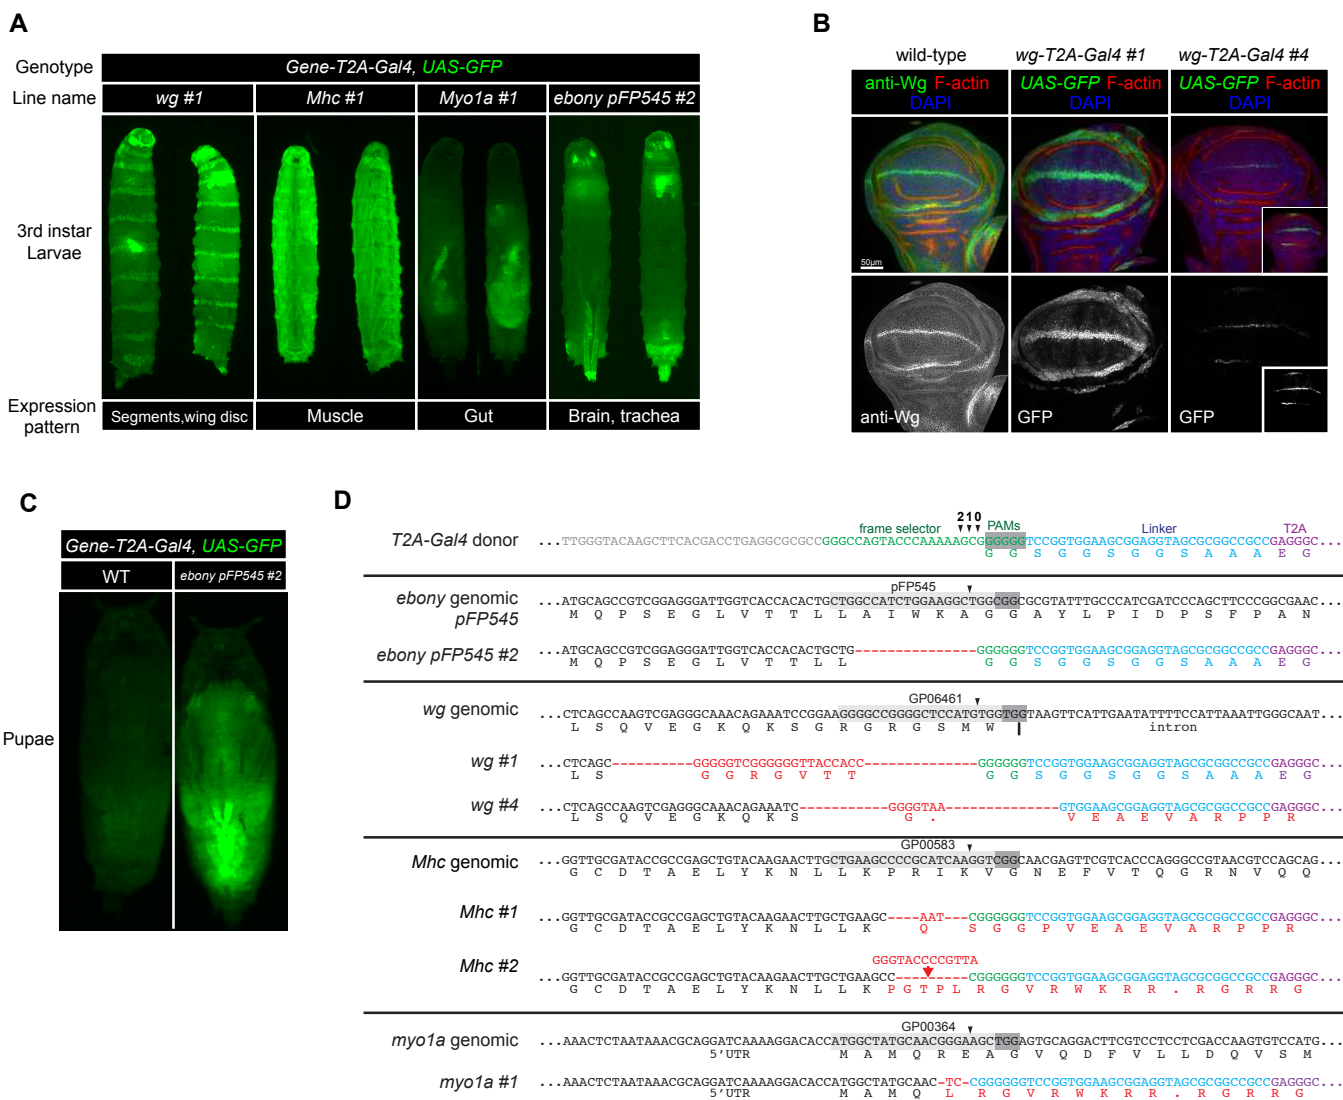

**Figure 4 – Germ line insertions that express *T2A-Gal4* under the control of the target gene. (A)** Fluorescence images of 3<sup>rd</sup> instar larvae with indicated genotypes. Expression of Gal4 under control of the target gene drives expression of the *UAS-GFP* reporter. **(B)** Confocal images of wing imaginal discs showing protein staining of Wg protein (anti-wg, green) or *UAS-GFP* expression (green). GFP fluorescence was recorded at identical exposure settings for lines *wg-T2A-Gal4* #1 and #4. Inset shows digitally increased GFP signal. Scale bar 50µm. **(C)** Fluorescence image of pupae, *ebony-T2A-Gal4 pFP545* #2 expression is visible throughout the cuticle. **(D)** Sequence structure of *T2A-Gal4* insertions that express Gal4.

## Figure 5

**A**

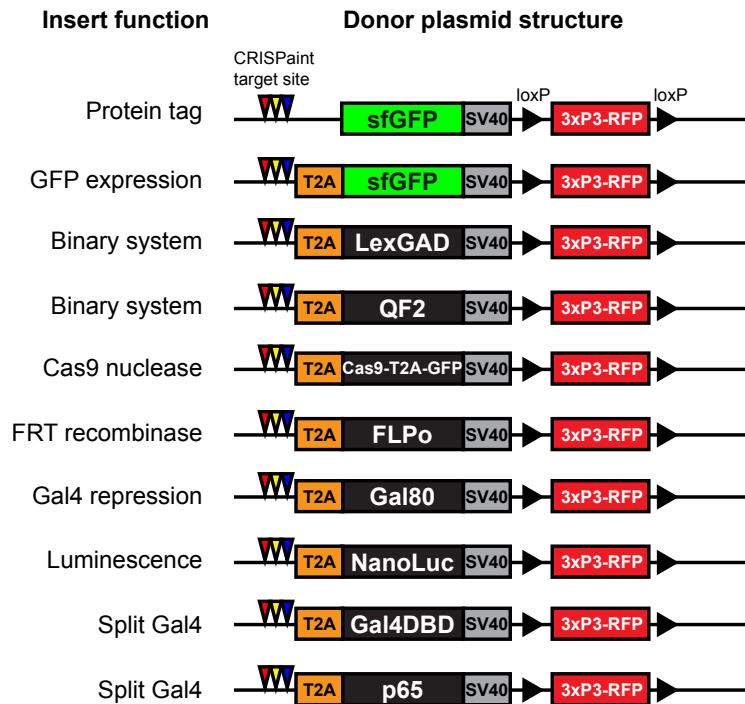

**B**

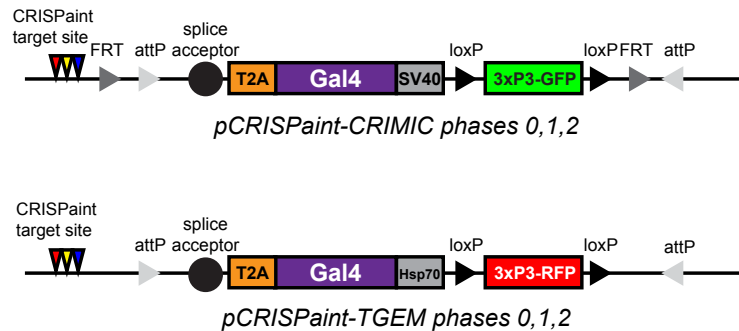

**Figure 5 – A collection of CRISPaint-compatible donor plasmids for germ line knock-ins. (A)** Donor plasmids for insertion into 5' coding sequence. **(B)** Donor plasmids for insertion into intronic sequence, modified from CRIMIC and T-GEM HDR donor plasmids.

## Supplemental Figure 1

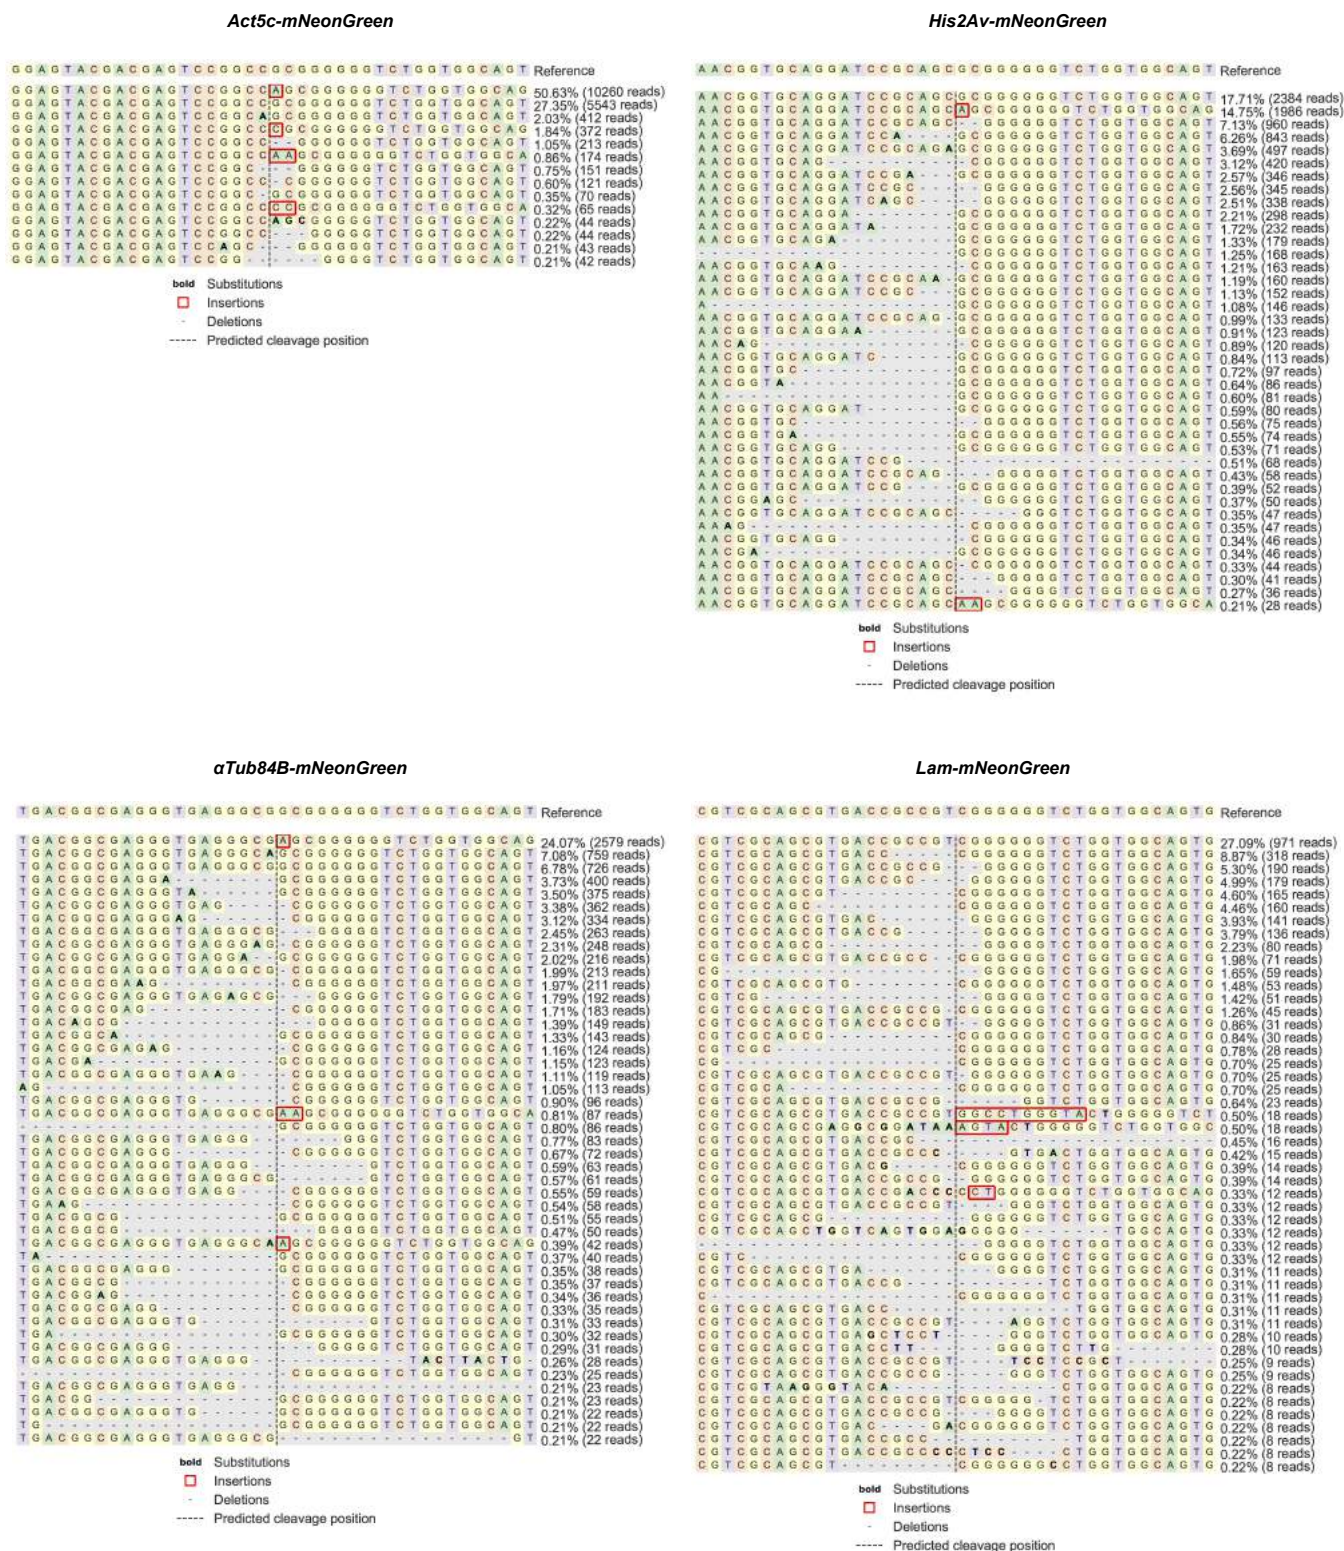

Supplemental Figure 1 – Next-generation sequencing analysis of mNeonGreen insertion sites in transfected S2R+ cells using CRISPresso2

## Supplemental Figure 2

### Sense insertion

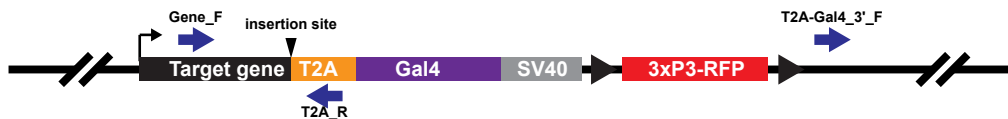

### Antisense insertion

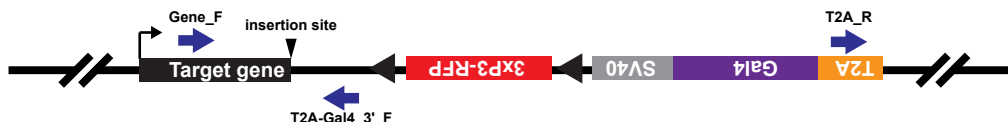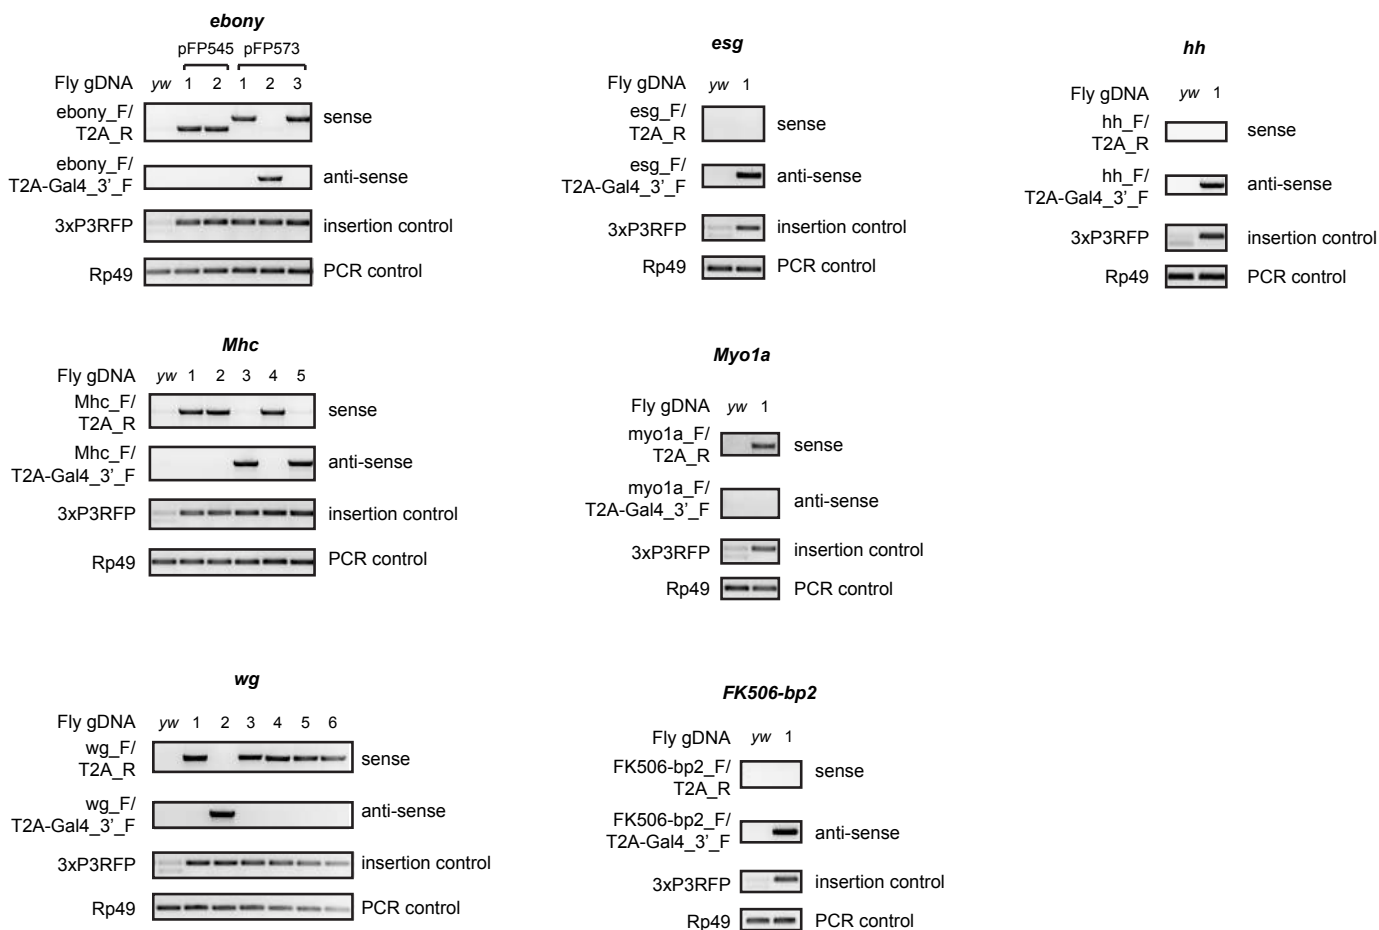

**Supplemental Figure 2 – Diagnostic PCR of *CRISPaint-T2A-Gal4* insertions in RFP+ fly lines to confirm their insertion site and orientation.**

## Supplemental Figure 3

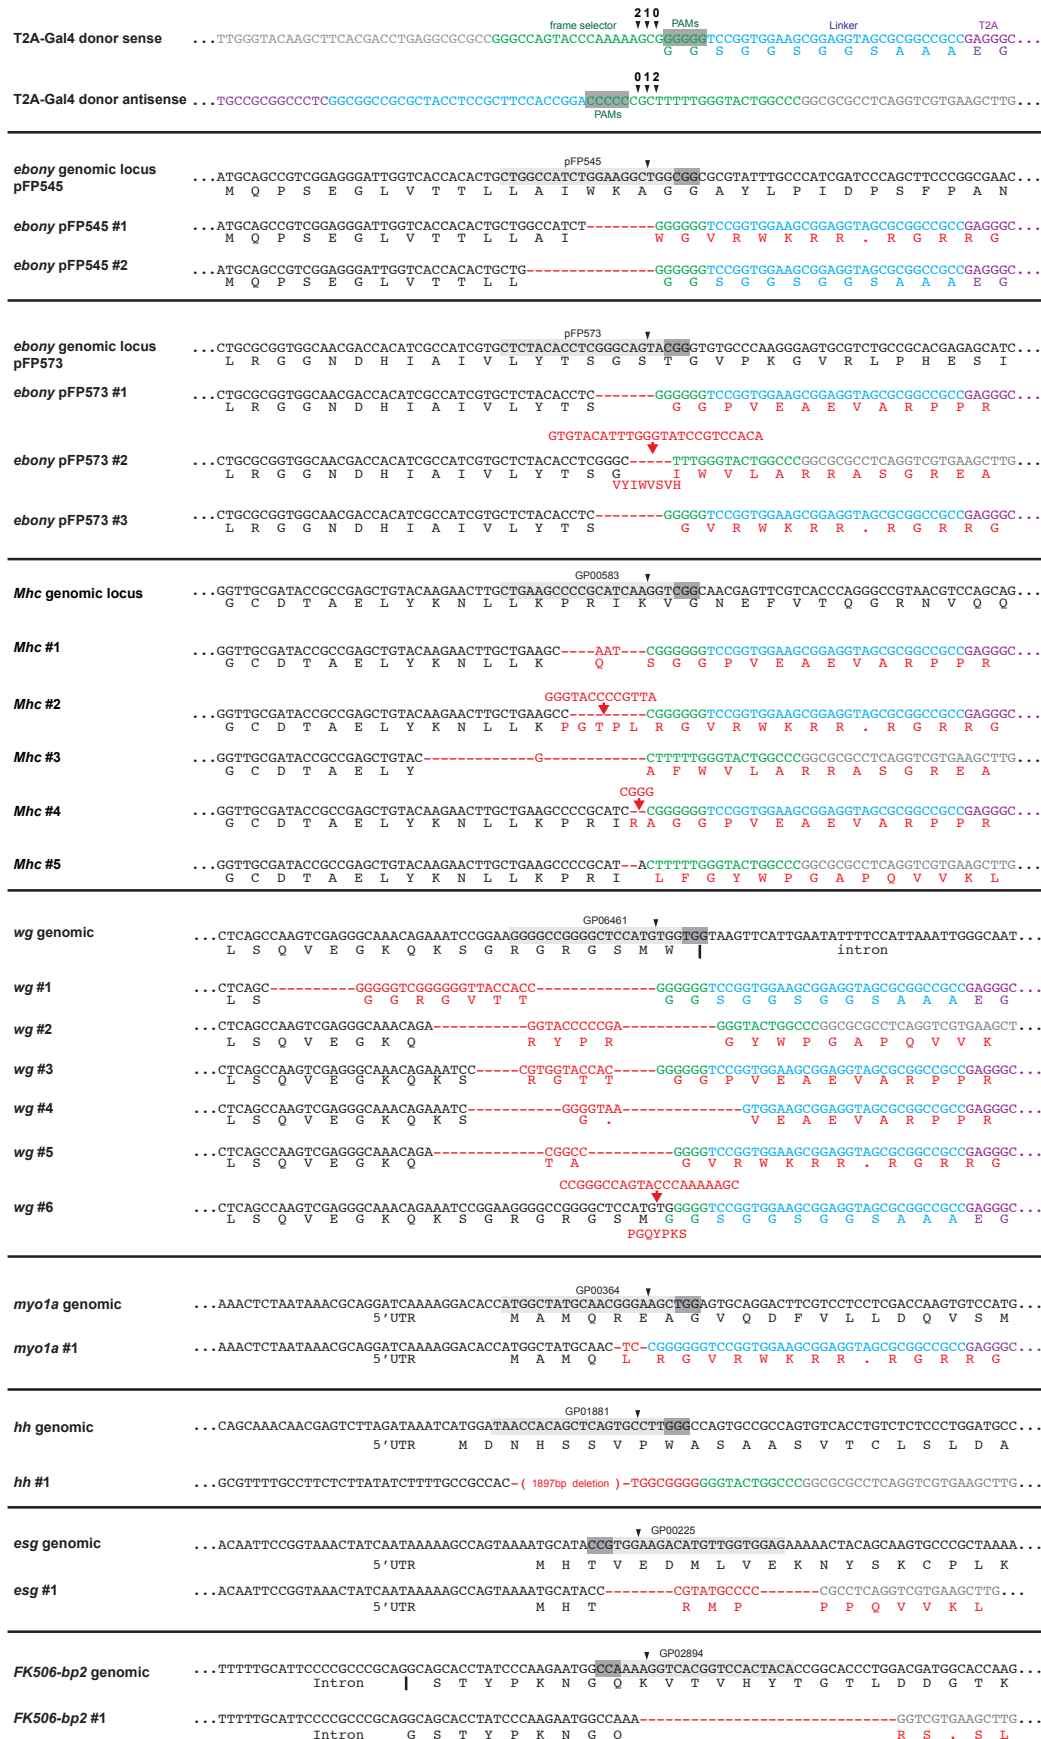

Supplemental Figure 3 – Sequence structure of *CRISPaint-T2A-Gal4* insertions in RFP+ fly lines



## Supplemental Figure 4

**A**

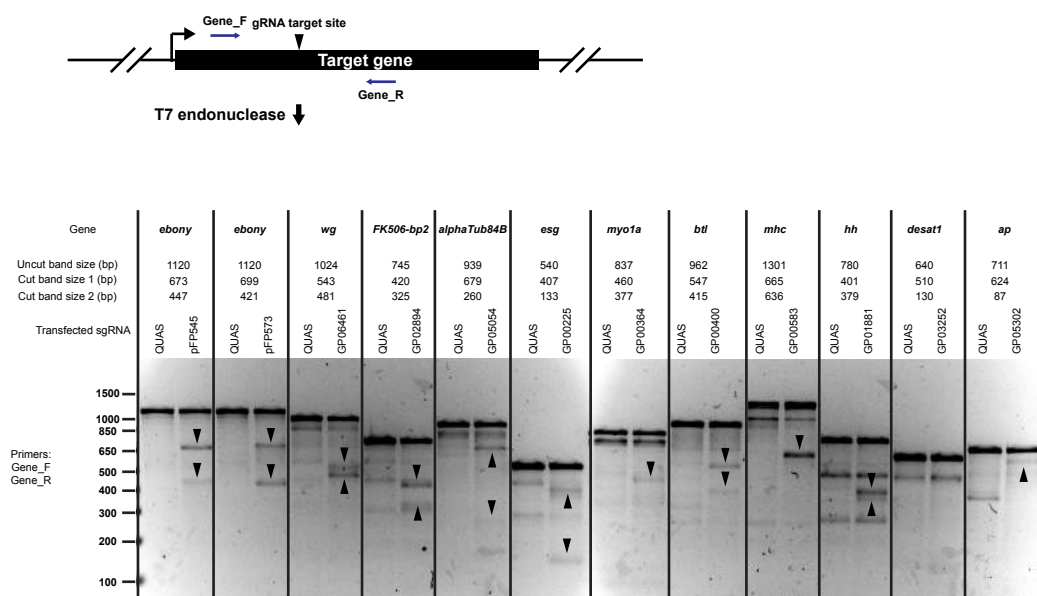

**B**

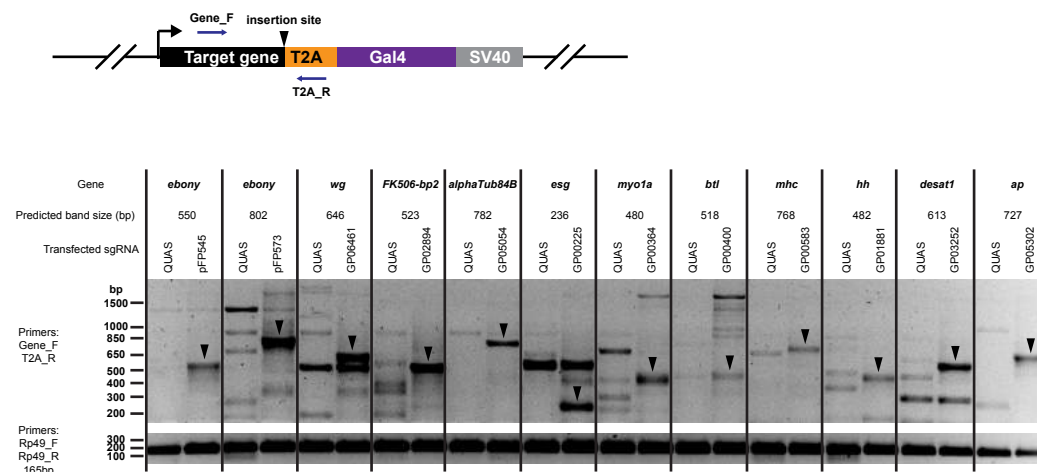

**Supplemental Figure 4 – Cutting efficiency of 12 sgRNAs in transfected S2R+ cells. (A)** T7 endonuclease assay. **(B)** Diagnostic PCR to detect for presence of sense orientation *CRISPaint-T2A-Gal4* insertion events.

| Gene and sgRNA information |                      |                      |                            |                      |
|----------------------------|----------------------|----------------------|----------------------------|----------------------|
| Gene Name                  | Protein localization | sgRNA plasmid (TRiP) | sgRNA target site with PAM | frame selector sgRNA |
| <i>Act5c</i>               | actin                | GP07595              | GCGGTGCACAAATGGAGGGGCCGG   | 2                    |
| <i>His2Av</i>              | chromatin            | GP07596              | GGTGCAGGATCCGCAGCGGAAGG    | 2                    |
| <i>αTub84B</i>             | microtubules         | GP07609              | CGGCAGGGTGAGGGCGTGAGG      | 2                    |
| <i>Lamin</i>               | nuclear envelope     | GP07612              | CGCAGCGTGACC GCCGTGGACGG   | 1                    |
| Untransfected              |                      |                      |                            |                      |

| CRISPresso2 output |          |                 |                   |             |
|--------------------|----------|-----------------|-------------------|-------------|
| Gene Name          | seamless | in-frame in/del | frameshift in/del | % in-frame  |
| <i>Act5c</i>       | 5543     | 1343            | 13068             | 34.50937155 |
| <i>His2Av</i>      | 2384     | 2620            | 8279              | 37.6722126  |
| <i>αTub84B</i>     | 726      | 3034            | 6901              | 35.26873652 |
| <i>Lamin</i>       | 971      | 801             | 1757              | 50.21252479 |
| Untransfected      |          |                 |                   |             |

| Gene Name      | FACs Transfected |                    |               | FACs Puro-selected |                    |              |
|----------------|------------------|--------------------|---------------|--------------------|--------------------|--------------|
|                | mNeonGreen+      | Single cells total | % mNeonGreen+ | mNeonGreen+        | Single cells total | % mNeonGreen |
| <i>Act5c</i>   | 1963             | 80589              | 2.435816302   | 45355              | 50883              | 89.1358607   |
| <i>His2Av</i>  | 1554             | 80291              | 1.935459765   | 32780              | 46298              | 70.80219448  |
| <i>αTub84B</i> | 150              | 78752              | 0.190471353   | 16682              | 52643              | 31.6889235   |
| <i>Lamin</i>   | 385              | 81688              | 0.471305455   | 34826              | 49234              | 70.73567047  |
| Untransfected  | 2                | 83869              | 0.002384671   | 10                 | 55656              | 0.017967515  |

| Gene Name      | Cell counting transfected (n=6) |                         |                       | Cell counting Puro-selected (n=3) |             |                       |
|----------------|---------------------------------|-------------------------|-----------------------|-----------------------------------|-------------|-----------------------|
|                | mNeonGreen+                     | Total cells             | Average % mNeonGreen+ | mNeonGreen+                       | Total cells | Average % mNeonGreen+ |
| <i>Act5c</i>   | 17/17/26/18/22/25               | 571/679/577/599/574/613 | 3.5                   | 342/280/318                       | 397/398/377 | 80.3                  |
| <i>His2Av</i>  | 26/21/12/19/13/19               | 634/634/568/525/669/612 | 3                     | 314/327/315                       | 397/402/400 | 79.7                  |
| <i>αTub84B</i> |                                 |                         |                       | 412/400/403                       | 412/400/403 | 100                   |
| <i>Lamin</i>   |                                 |                         |                       | 270/282/259                       | 382/388/374 | 70.9                  |
| Untransfected  |                                 |                         |                       |                                   |             |                       |

**Supplemental Table 1 – Quantification of CRISPaint-mNeonGreen insertion events in transfected and puro-selected S2R+ cells by CRISPresso2, FACs, and cell counting of confocal images.**

| Clone name | Gene-mNeonGreen | predicted mNeonGreen fusion (kDa) | Observed Localization      | mNeon insertion site      | endogenous gene                      |               |               |               |
|------------|-----------------|-----------------------------------|----------------------------|---------------------------|--------------------------------------|---------------|---------------|---------------|
|            |                 |                                   |                            |                           | allele 1                             | allele 2      | allele 3      | allele 4      |
| A3         | Act5c           | 71.4                              | very infrequent small rods | seamless                  | 1bp deletion                         | 1bp insertion |               |               |
| A5         | Act5c           | 71.4                              | very frequent long rods    | seamless                  | numerous in/dels                     |               |               |               |
| A19        | Act5c           | 71.4                              | no rods, cyto and nuclear  | N/A                       | numerous in/dels                     |               |               |               |
| B1         | His2Av          | 44.5                              | cyto and nuclear           | N/A                       | 4bp deletion                         | 19bp deletion |               |               |
| B11        | His2Av          | 44.5                              | nuclear                    | seamless                  | 3bp deletion                         | 2bp deletion  | 1bp deletion  | 27bp deletion |
| B14        | His2Av          | 44.5                              | nuclear                    | 3 bp deletion, 1bp change | 19bp deletion                        | 3bp deletion  | 1bp deletion  |               |
| C2         | alphatub84B     | 79.5                              | mitotic spindles           | seamless                  | wt                                   | 6bp deletion  | 1bp deletion  |               |
| C6         | alphatub84B     | 79.5                              | mitotic spindles           | seamless                  | insertion of 1482bp from alphatub84D |               |               |               |
| C13        | alphatub84B     | 79.5                              | mitotic spindles           | 3bp deletion              | wt                                   | 6bp insertion |               |               |
| D1         | Lam             | 100.9                             | cytoplasmic, nuclear       | N/A                       | 8bp deletion                         | 4bp deletion  | 3bp insertion |               |
| D6         | Lam             | 100.9                             | nuclear lamina             | seamless                  | 3bp deletion                         |               |               |               |
| D9         | Lam             | 100.9                             | nuclear lamina, polarized  | seamless                  | N/A                                  |               |               |               |

**Supplemental Table 2 – Molecular characterization of single cell cloned mNeonGreen-expressing S2R+ lines.**

| Gene        | Chr. | target gene sgRNA | target site (no PAM) | Frame selector sgRNA | # G0 crosses | # G0 founders | % founders/total | # G1 progeny screened | # G1 RFP+ progeny | % RFP G1/total G1 |
|-------------|------|-------------------|----------------------|----------------------|--------------|---------------|------------------|-----------------------|-------------------|-------------------|
| Mhc         | 2    | GP00583           | CTGAAGCCCCGCATCAAGGT | 1                    | 29           | 6             | 21               | 2086                  | 21                | 1.01              |
| ebony       | 3    | pFP545            | TGGCCATCTGGAAGGCTGG  | 1                    | 16           | 3             | 19               | 1298                  | 11                | 0.85              |
| FK506-bp2   | 2    | GP02894           | TGTAGTGGACCGTGACCTTT | 1                    | 13           | 2             | 15               | 901                   | 2                 | 0.22              |
| wg          | 2    | GP06461           | GGGGCCGGGGCTCCATGTGG | 0                    | 40           | 6             | 15               | 4423                  | 26                | 0.59              |
| ebony       | 3    | pFP573            | TCTACACCTCGGGCAGTAC  | 1                    | 23           | 3             | 13               | 2121                  | 27                | 1.27              |
| esg         | 2    | GP00225           | CTCCACCAACATGTCTCCA  | 2                    | 15           | 1             | 7                | 772                   | 1                 | 0.13              |
| Myo1a       | 2    | GP00364           | ATGGCTATGCAACGGGAAGC | 1                    | 17           | 1             | 6                | 860                   | 1                 | 0.12              |
| hh          | 3    | GP01881           | TAACCACAGCTCAGTGCCTT | 2                    | 39           | 2             | 5                | 1975                  | 3                 | 0.15              |
| alphaTub84B | 3    | GP05054           | GCTGACGGTAGGTTCCGGTA | 1                    | 6            | 0             | 0                | 506                   | 0                 | 0.00              |
| btl         | 2    | GP00400           | GGCAAAAGTGCCGATCACGC | 2                    | 26           | 0             | 0                | 2085                  | 0                 | 0.00              |
| Desat1      | 3    | GP03252           | AAGCTGCAGGAGGACTCCAC | 1                    | 7            | 0             | 0                | 386                   | 0                 | 0.00              |
| ap          | 2    | GP05302           | CACCACCTGTAGCATCAA   | 0                    | 29           | 0             | 0                | 2928                  | 0                 | 0.00              |

**Supplemental Table 3 – Germ line knock-in efficiency of *CRISPaint-T2A-Gal4***

| #  | Gene targeted | sgRNA   | G0 cross # | Insert orientation | Insert frame | Insertion site sequence | Gal4 expression                                                                  | Homozygous phenotype | Complementation test                                   |
|----|---------------|---------|------------|--------------------|--------------|-------------------------|----------------------------------------------------------------------------------|----------------------|--------------------------------------------------------|
| 1  | ebony         | pFP545  | 1          | Sense              | Out          | 8bp del                 | none                                                                             | dark cuticle pigment | fail to complement e1 on TM3                           |
| 2  | ebony         | pFP545  | 2          | Sense              | In           | 15bp del                | anterior and posterior tracheae in larvae, whole body cuticle in pupae and adult | dark cuticle pigment | fail to complement e1 on TM3                           |
| 3  | ebony         | pFP573  | 1          | Sense              | Out          | 7bp del                 | none                                                                             | dark cuticle pigment | fail to complement e1 on TM3                           |
| 4  | ebony         | pFP573  | 2          | Antisense          | N/A          | 5bp del, 25bp ins       | none                                                                             | dark cuticle pigment | fail to complement e1 on TM3                           |
| 5  | ebony         | pFP573  | 3          | Sense              | Out          | 8bp deletion            | none                                                                             | dark cuticle pigment | fail to complement e1 on TM3                           |
| 6  | hh            | GP01881 | 1          | Antisense          | N/A          | 1897bp del, 8bp ins     | none                                                                             | lethal               | fail to complement hh[AC], Df(3R)ED5296                |
| 7  | Mhc           | GP00583 | 1          | Sense              | Out          | 10bp del, 3bp ins       | muscle                                                                           | lethal               | fail to complement P{lacW}Mhck10423, Df(2L)H20         |
| 8  | Mhc           | GP00583 | 2          | Sense              | Out          | 9bp del, 13bp ins       | muscle                                                                           | lethal               | fail to complement P{lacW}Mhck10423, Df(2L)H20         |
| 9  | Mhc           | GP00583 | 3          | Antisense          | N/A          | 27bp del, 1bp ins       | none                                                                             | lethal               | fail to complement P{lacW}Mhck10423, Df(2L)H20         |
| 10 | Mhc           | GP00583 | 4          | Sense              | Out          | 2bp del, 4bp ins        | none                                                                             | lethal               | fail to complement P{lacW}Mhck10423, Df(2L)H20         |
| 11 | Mhc           | GP00583 | 5          | Antisense          | N/A          | 2bp deletion            | none                                                                             | lethal               | fail to complement P{lacW}Mhck10423, Df(2L)H20         |
| 12 | Myo1a         | GP00364 | 1          | Sense              | Out          | 4bp del, 2bp ins        | gut                                                                              | viable               | complement Df(2L)ED8142                                |
| 13 | esg           | GP00225 | 1          | Antisense          | N/A          | 25bp del, 10bp          | none                                                                             | lethal               | fail to complement P{enG}esg[G66]                      |
| 14 | FK506-bp2     | GP02894 | 1          | Antisense          | N/A          | 30bp del                | none                                                                             | viable               | complement Df(2R)Exel6069                              |
| 15 | wg            | GP06461 | 1          | Sense              | In           | 45bp del, 21bp ins      | wingless, strong expression                                                      | lethal               | fail to complement wg[l-17], wg[l-8], and Df(2L)BSC291 |
| 16 | wg            | GP06461 | 2          | Antisense          | N/A          | 33bp del, 11bp ins      | none                                                                             | lethal               | fail to complement wg[l-17], wg[l-8], and Df(2L)BSC291 |
| 17 | wg            | GP06461 | 3          | Sense              | Out          | 21bp del, 11bp ins      | none                                                                             | lethal               | fail to complement wg[l-17], wg[l-8], and Df(2L)BSC291 |
| 18 | wg            | GP06461 | 4          | Sense              | Out          | 32bp del, 7bp ins       | wingless, weak expression                                                        | lethal               | fail to complement wg[l-17], wg[l-8], and Df(2L)BSC291 |
| 19 | wg            | GP06461 | 5          | Sense              | Out          | 28bp del, 5bp ins       | none                                                                             | in progress          | fail to complement wg[l-17], wg[l-8], and Df(2L)BSC291 |
| 20 | wg            | GP06461 | 6          | Sense              | In           | 21bp insertion          | none                                                                             | in progress          | in progress                                            |

**Supplemental Table 4 – Molecular and phenotypic characterization of 20 RFP+ fly strains, each carrying a distinct *CRISPaint-T2A-Gal4* insertion.**

| gene        | sgRNA name | sgRNA sequence       | DRSC efficiency score |
|-------------|------------|----------------------|-----------------------|
| ebony       | pFP545     | gTGGCCATCTGGAAGGCTGG | 5.56968               |
| ebony       | pFP573     | gTCTACACCTCGGGCAGTAC | 5.08877               |
| wg          | GP06461    | GGGGCCGGGGCTCCATGTGG | 5.61857               |
| FK506-bp2   | GP02894    | TGTAGTGGACCGTGACCTTT | 6.5446                |
| alphaTub84B | GP05054    | GCTGACGGTAGGTTCCGGTA | 6.20359               |
| esg         | GP00225    | CTCCACCAACATGTCTTCCA | 9.35069               |
| Myo1a       | GP00364    | ATGGCTATGCAACGGGAAGC | 7.98579               |
| btl         | GP00400    | GGCAAAAGTGCCGATCACGC | 3.52487               |
| Mhc         | GP00583    | CTGAAGCCCCGCATCAAGGT | 8.00559               |
| hh          | GP01881    | TAACCACAGCTCAGTGCCTT | 6.99912               |
| Desat1      | GP03252    | AAGCTGCAGGAGGACTCCAC | 6.60024               |
| ap          | GP05302    | CACCACCTGTAGCACATCAA | 5.73411               |

**Supplemental Table 5 – Efficiency scores for 12 sgRNAs used in germ line knock-ins**

| Name                                | Sequence                                                                                                                                                                                                                    | How used                                                                        |
|-------------------------------------|-----------------------------------------------------------------------------------------------------------------------------------------------------------------------------------------------------------------------------|---------------------------------------------------------------------------------|
| JB880_frame+0_gRNA_top              | GTCGgcagtagcccaaaaagcggg                                                                                                                                                                                                    | for cloning pCFD3-CRISPaint frameselector                                       |
| JB881_frame+0_gRNA_bot              | AAACcccgcttttgggtactggc                                                                                                                                                                                                     | for cloning pCFD3-CRISPaint frameselector                                       |
| JB882_frame+1_gRNA_top              | GTCGggccagtagcccaaaaagcggg                                                                                                                                                                                                  | for cloning pCFD3-CRISPaint frameselector                                       |
| JB883_frame+1_gRNA_bot              | AAACcccgcttttgggtactggc                                                                                                                                                                                                     | for cloning pCFD3-CRISPaint frameselector                                       |
| JB884_frame+2_gRNA_top              | GTCGggccagtagcccaaaaagcggg                                                                                                                                                                                                  | for cloning pCFD3-CRISPaint frameselector                                       |
| JB885_frame+2_gRNA_bot              | AAACcccgcttttgggtactggc                                                                                                                                                                                                     | for cloning pCFD3-CRISPaint frameselector                                       |
| JB886_target-T2A-Gal4overlap_gBlock | ttaacgacctgagcgcgcggccagtagcccaaaaagcggggggtccggtggaagcggaggtagcggcggcccgagggcgcgcgacctgctgacctggcggcggatgtggaggagaaccccgccctTAGCATgaagctactgtctctatgacgaacagcgcgatatttgccgactaaagaagctcaagtctccaagaaaaccgaagtgcgccaagtgtct | gBlock containing CRISPaint site and T2A and overlap sequence                   |
| JB877_Gal4_F                        | atgaagctactgtctctatcogaaca                                                                                                                                                                                                  | to amplify Gal4-3xP3RFP                                                         |
| JB878_target-T2A-Gal4_P3RFP_R       | gggaacaaaagctggagctcataacttctatagcacaattatatacgaagtattCGTATGGGCCTTCGCTGCTTACAG                                                                                                                                              | to amplify Gal4-3xP3RFP                                                         |
| JB915_sfGFP_HIKI_T2A_F              | tgtggaggagaaccccgcccgctagcGTGGTCAAGGGCAGGAG                                                                                                                                                                                 | for cloning into JAB290 cut with NheI/KpnI                                      |
| JB916_sfGFP_HIKI_R                  | caaatgctctctagaggtaccTACTTGTACAGTCCATCCATGC                                                                                                                                                                                 | for cloning into JAB290 cut with NheI/KpnI                                      |
| JB1000_LexGAD_HIKI_T2A_F            | tgtggaggagaaccccgcccgctagcGTGGTCAAGGGCAGGAG                                                                                                                                                                                 | for cloning into JAB290 cut with NheI/KpnI                                      |
| JB1001_LexGAD_HIKI_R                | caaatgctctctagaggtaccTACTTGTTCCTTCTTGGGTTCCG                                                                                                                                                                                | for cloning into JAB290 cut with NheI/KpnI                                      |
| JB998_QF2_HIKI_T2A_F                | tgtggaggagaaccccgcccgctagcGTGGTCAAGGGCAGGAG                                                                                                                                                                                 | for cloning into JAB290 cut with NheI/KpnI                                      |
| JB999_QF2_HIKI_R                    | caaatgctctctagaggtaccTACTTGTTCCTTCTTGGGTTCCG                                                                                                                                                                                | for cloning into JAB290 cut with NheI/KpnI                                      |
| JB1055_Cas9-T2A-EGFP_HIKI_T2A_F     | tgtggaggagaaccccgcccgctagcGTGGTCAAGGGCAGGAG                                                                                                                                                                                 | for cloning into JAB290 cut with NheI/KpnI                                      |
| JB1056_Cas9-T2A-EGFP_HIKI_R         | caaatgctctctagaggtaccTACTTGTTCCTTCTTGGGTTCCG                                                                                                                                                                                | for cloning into JAB290 cut with NheI/KpnI                                      |
| JB1002_FLPo_HIKI_T2A_F              | tgtggaggagaaccccgcccgctagcGTGGTCAAGGGCAGGAG                                                                                                                                                                                 | for cloning into JAB290 cut with NheI/KpnI                                      |
| JB1003_FLPo_HIKI_R                  | caaatgctctctagaggtaccTACTTGTTCCTTCTTGGGTTCCG                                                                                                                                                                                | for cloning into JAB290 cut with NheI/KpnI                                      |
| JB1004_Gal80_HIKI_T2A_F             | tgtggaggagaaccccgcccgctagcGTGGTCAAGGGCAGGAG                                                                                                                                                                                 | for cloning into JAB290 cut with NheI/KpnI                                      |
| JB1005_Gal80_HIKI_R                 | caaatgctctctagaggtaccTACTTGTTCCTTCTTGGGTTCCG                                                                                                                                                                                | for cloning into JAB290 cut with NheI/KpnI                                      |
| JB1008_Nluc_HIKI_T2A_F              | tgtggaggagaaccccgcccgctagcGTGGTCAAGGGCAGGAG                                                                                                                                                                                 | for cloning into JAB290 cut with NheI/KpnI                                      |
| JB1009_Nluc_HIKI_R                  | caaatgctctctagaggtaccTACTTGTTCCTTCTTGGGTTCCG                                                                                                                                                                                | for cloning into JAB290 cut with NheI/KpnI                                      |
| JB1032_Gal4DBD_HIKI_T2A_F           | tgtggaggagaaccccgcccgctagcGTGGTCAAGGGCAGGAG                                                                                                                                                                                 | for cloning into JAB290 cut with NheI/KpnI                                      |
| JB1033_Gal4DBD_HIKI_R               | caaatgctctctagaggtaccTACTTGTTCCTTCTTGGGTTCCG                                                                                                                                                                                | for cloning into JAB290 cut with NheI/KpnI                                      |
| JB1030_p65_HIKI_T2A_F               | tgtggaggagaaccccgcccgctagcGTGGTCAAGGGCAGGAG                                                                                                                                                                                 | for cloning into JAB290 cut with NheI/KpnI                                      |
| JB1031_p65_HIKI_R                   | caaatgctctctagaggtaccTACTTGTTCCTTCTTGGGTTCCG                                                                                                                                                                                | for cloning into JAB290 cut with NheI/KpnI                                      |
| JB917_sfGFP_HIKI_F                  | ggtagaagcggaggtagcggcggccgGTGGTCAAGGGCAGGAG                                                                                                                                                                                 | for cloning into JAB290 cut with NotI/KpnI                                      |
| JB916_sfGFP_HIKI_R                  | caaatgctctctagaggtaccTACTTGTTCCTTCTTGGGTTCCG                                                                                                                                                                                | for cloning into JAB290 cut with NotI/KpnI                                      |
| JB969_crispainsite_Nsil_top         | aggccagtagcccaaaaagcggggggtTGCA                                                                                                                                                                                             | for cloning into CRIMIC pM37                                                    |
| JB970_crispainsite_Nsil_bottom      | accccgcttttgggtactggccctTGCA                                                                                                                                                                                                | for cloning into CRIMIC pM37                                                    |
| JB971_crispainsite_Agel-NotI_top    | ccggtggccagtagcccaaaaagcgggggggc                                                                                                                                                                                            | for cloning into T-GEM                                                          |
| JB972_crispainsite_Agel-NotI_bottom | ggccgcccccgcttttgggtactggccca                                                                                                                                                                                               | for cloning into T-GEM                                                          |
| JB1355_FK506-bp2_gen0_1F            | acgcccacaaatacaaaaac                                                                                                                                                                                                        | amplification of endogenous target gene and knock-in                            |
| JB1356_FK506-bp2_gen0_1R            | GCCTATTCGACCTTGAGCAG                                                                                                                                                                                                        | amplification of endogenous target gene                                         |
| JB1357_alphaTub84B_gen0_1F          | tttgtgtggggcaaaatccaa                                                                                                                                                                                                       | amplification of endogenous target gene and knock-in                            |
| JB1358_alphaTub84B_gen0_1R          | GCTTGGACTTCTTGGCCGTAG                                                                                                                                                                                                       | amplification of endogenous target gene                                         |
| JB1359_esg_gen0_1F                  | CGTGTGGTATTGTGTCATCG                                                                                                                                                                                                        | amplification of endogenous target gene and knock-in                            |
| JB1360_esg_gen0_1R                  | GTAGGGCGACATGTGGAAGT                                                                                                                                                                                                        | amplification of endogenous target gene                                         |
| JB1361_btl_gen0_1F                  | aactaagggaggggcaaaaa                                                                                                                                                                                                        | amplification of endogenous target gene and knock-in                            |
| JB1362_btl_gen0_1R                  | CGTCCACCAAGGATTTGAGT                                                                                                                                                                                                        | amplification of endogenous target gene                                         |
| JB1363_Desat1_gen0_1F               | aatccacctggtgcttcttct                                                                                                                                                                                                       | amplification of endogenous target gene and knock-in                            |
| JB1364_Desat1_gen0_1R               | GTAAACCAAGGCGATGATGT                                                                                                                                                                                                        | amplification of endogenous target gene                                         |
| JB1365_ap_gen0_1F                   | ttgcaaatctctcaggaacg                                                                                                                                                                                                        | amplification of endogenous target gene and knock-in                            |
| JB1366_ap_gen0_1R                   | ATCTGGACACGAGGATGAGG                                                                                                                                                                                                        | amplification of endogenous target gene                                         |
| JB959_ebony_gen0_F                  | gcattagcctgcattgcata                                                                                                                                                                                                        | amplification of endogenous target gene and knock-in                            |
| JB960_ebony_gen0_R                  | CACGCCCTCATCGAAATAGT                                                                                                                                                                                                        | amplification of endogenous target gene                                         |
| JB961_wg_gen0_F                     | CAGTTAAGCGTTGGCAGTGA                                                                                                                                                                                                        | amplification of endogenous target gene and knock-in                            |
| JB962_wg_gen0_R                     | ttgttgcctctctcgggtag                                                                                                                                                                                                        | amplification of endogenous target gene                                         |
| JB963_Myo1a_gen0_F                  | TCGTCTCATCAACAGAAAGC                                                                                                                                                                                                        | amplification of endogenous target gene and knock-in                            |
| JB964_Myo1a_gen0_R                  | tctggagtggaaccgaaaaac                                                                                                                                                                                                       | amplification of endogenous target gene                                         |
| JB965_Mhc_gen0_F                    | cggctaaagactgacccaaa                                                                                                                                                                                                        | amplification of endogenous target gene and knock-in                            |
| JB966_Mhc_gen0_R                    | CTCTTGTCTCATGACGAACA                                                                                                                                                                                                        | amplification of endogenous target gene                                         |
| JB967_hh_gen0_F                     | TCGTACTCGCACTCGAACAC                                                                                                                                                                                                        | amplification of endogenous target gene and knock-in                            |
| JB1388_hh_gen0_6F                   | aaatcaagctggaccacaaatc                                                                                                                                                                                                      | amplification of endogenous target gene and knock-in, used with hh #1 insertion |
| JB968_hh_gen0_R                     | GTTGTAGTTGGCCAGGAGT                                                                                                                                                                                                         | amplification of endogenous target gene                                         |
| JB900_T2A_R                         | cggggttctctctccacat                                                                                                                                                                                                         | reverse primer for amplifying T2A-Gal4 insert in sense orientation              |
| JB958_T2A-Gal4_3'F                  | gttttcccagtcacagcgtt                                                                                                                                                                                                        | reverse primer for amplifying T2A-Gal4 insert in antisense orientation          |
| JB659_3P3dsred_seq1F                | ACTCCAAGTGGACATCACCC                                                                                                                                                                                                        | to amplify 3xP3-dsred as a control                                              |
| JB660_3P3dsred_seq1R                | CGAGGGTTCGAAATCGATAA                                                                                                                                                                                                        | to amplify 3xP3-dsred as a control                                              |
| JB713_Rp49_F                        | ATCGGTTACGGATCGAACAA                                                                                                                                                                                                        | to amplify endogenous Rp49 gene as a control                                    |
| JB714_Rp49_R                        | GACAATCTCCTTGGCCTTCT                                                                                                                                                                                                        | to amplify endogenous Rp49 gene as a control                                    |
| JB1051_alphaTub84B_C-term_F         | CCTTCGCTCACTGGTACGTT                                                                                                                                                                                                        | amplification of endogenous target gene and knock-in                            |
| JB1052_Act5c_C-term_F               | CGTCGACCATGAAGATCAAG                                                                                                                                                                                                        | amplification of endogenous target gene and knock-in                            |
| JB1053_His2Av_C-term_F              | CTCCTCGCACTTACAGCTC                                                                                                                                                                                                         | amplification of endogenous target gene and knock-in                            |
| JB1054_Lam_C-term_F                 | GCCGACAACTAGGACGAT                                                                                                                                                                                                          | amplification of endogenous target gene and knock-in                            |
| JB1050_mNeonGreen_R                 | GGGAGAGGGCGTTATCCTC                                                                                                                                                                                                         | reverse primer for amplifying gene-mNeonGreen insert                            |
| JB1120_act5c_seqnextgenR            | CGACTTCTCCTCCTCCTCCT                                                                                                                                                                                                        | amplification of endogenous target gene                                         |
| JB1121_His2av_seqnextgenR           | TCGTCTGGTGTTTAGCTTGTCT                                                                                                                                                                                                      | amplification of endogenous target gene                                         |
| JB1122_alphatub_seqnextgenR         | GCGATTGGAAGCGTAAACAC                                                                                                                                                                                                        | amplification of endogenous target gene                                         |
| JB1123_Lam_seqnextgenR              | GTGTTGTCTGCTGCTTTGATT                                                                                                                                                                                                       | amplification of endogenous target gene                                         |
| JB1192_Lam_2F                       | GCGGCTAATCAACGAGAAAG                                                                                                                                                                                                        | amplification of non-knock-in Lamin gene                                        |
| JB1193_Lam_2R                       | TCGTGTGTCAGGAGCGTTTG                                                                                                                                                                                                        | amplification of non-knock-in Lamin gene                                        |
| JB1194_Lam_3F                       | ACGAGGACGAGATGCAGATT                                                                                                                                                                                                        | amplification of non-knock-in Lamin gene                                        |
| JB1195_Lam_3R                       | GGTCTAAACCGGAGAAAGC                                                                                                                                                                                                         | amplification of non-knock-in Lamin gene                                        |
| JB1196_Lam_4F                       | AGCTGCAGAACCTGAACGAT                                                                                                                                                                                                        | amplification of non-knock-in Lamin gene                                        |
| JB1197_Lam_4R                       | ACTAGCCGAACCCAGGATTT                                                                                                                                                                                                        | amplification of non-knock-in Lamin gene                                        |
| JB1198_Lam_5F                       | ccattacaagcagcagattt                                                                                                                                                                                                        | amplification of non-knock-in Lamin gene                                        |
| JB1199_Lam_5R                       | GAACAGCTCCACTCCTCCAG                                                                                                                                                                                                        | amplification of non-knock-in Lamin gene                                        |
| JB1200_Lam_6F                       | GTCTCGGTCTGCTCCTCATC                                                                                                                                                                                                        | amplification of non-knock-in Lamin gene                                        |
| JB1201_Lam_6R                       | GAATGGCATAGCCACCCTT                                                                                                                                                                                                         | amplification of non-knock-in Lamin gene                                        |
| JB1202_Lam_7F                       | CATTGCAAGATGGTGGTTG                                                                                                                                                                                                         | amplification of non-knock-in Lamin gene                                        |
| JB1203_Lam_7R                       | ccaattagggcaaacactgct                                                                                                                                                                                                       | amplification of non-knock-in Lamin gene                                        |
| JB1050_mNeonGreen_R                 | GGGAGAGGGCGTTATCCTC                                                                                                                                                                                                         | amplification and sequencing primer, 5' end of mNeonGreen                       |

Supplemental Table 6 – Oligo and dsDNA sequences
